# Supplementary material for: Late developing cardiac lymphatic vasculature supports adult zebrafish heart function and regeneration
Source: eLife. 2019 Nov 8;8:e42762. doi: 10.7554/eLife.42762 (PMC6881116; doi:10.7554/eLife.42762)
Supplement: Figure 3—source data 1. [file elife-42762-fig3-data1.xlsx]

## Sheet: Figure 3
File name	Ventricle Area	Flt4	Fli	Kdrl	Fli selection	Flt4 density	Fli density	Kdrl density	Vessel density	Average Flt4	Average Fli density	Average Kdrl density	Average vessel density
119dpf WT KdrlmTur FliGFP Lyve1DsRed 34mm 1 max.lsm	1.10813e+06	14395.7	401554	13982.1	398098	0.0129911	0.362371	0.0126178	0.359253
119dpf WT KdrlmTur FliGFP Lyve1DsRed 34mm 1b max.lsm	1.16208e+06	17654.8	443059	21262.4	435082	0.0151924	0.381263	0.0182967	0.374398	0.0140917	0.371817	0.0154573	0.366825	Cardiac vessel coverage of the ventricle
119dpf WT KdrlmTur FliGFP Lyve1DsRed 36mm 2 max.lsm	1.30543e+06	18820.9	483898	8476.98	387485	0.0144174	0.370681	0.00649362	0.296825
119dpf WT KdrlmTur FliGFP Lyve1DsRed 36mm 2b max.lsm	1.08546e+06	6311.3	174331	1715.69	147464	0.00581439	0.160605	0.00158061	0.135853	0.0101159	0.265643	0.00403712	0.216339
119dpf WT KdrlmTur FliGFP Prox1RFP 35mm 3 max.lsm	1.21241e+06	43476.4	415838	39889.9	342421	0.0358594	0.342984	0.0329013	0.282429
119dpf WT KdrlmTur FliGFP Prox1RFP 35mm 3b max.lsm	1.21013e+06	9800.14	247472	4461.57	254371	0.00809843	0.204501	0.00368686	0.210202	0.0219789	0.273742	0.0182941	0.246316
119dpf WT KdrlmTur Flt4mCit FliGFP Lyve1DsRed 30mm 4 max.lsm	841898	4764.11	133368	4409.87	80842.5	0.00565878	0.158414	0.00523801	0.0960241
119dpf WT KdrlmTur Flt4mCit FliGFP Lyve1DsRed 30mm 4b max.lsm	661915	112.975	65121.7	4882.84	66105.9	0.000170679	0.0983838	0.00737683	0.0998707	0.00291473	0.128399	0.00630742	0.0979474
119dpf WT KdrlmTur Flt4mCit FliGFP Lyve1DsRed 34mm 5 max.lsm	990335	11910.3	279145	31024.2	258338	0.0120265	0.281869	0.031327	0.26086
119dpf WT KdrlmTur Flt4mCit FliGFP Lyve1DsRed 34mm 5b max.lsm	959318	4668.37	217081	9210.37	154659	0.00486635	0.226287	0.00960095	0.161218	0.00844644	0.254078	0.020464	0.211039
MAX_160dpf WT KdrlmTur Flt4mCit FliGFP Lyve1DsRed 35mm 8b.tif	1.38331e+06	9055.27	484462	24841.2	449870	0.0065461	0.35022	0.0179578	0.325213
MAX_160dpf WT KdrlmTur Flt4mCit FliGFP Lyve1DsRed 35mm 8.tif	1.39901e+06	32106.1	362042	32150.1	301694	0.0229491	0.258784	0.0229805	0.215648	0.0147476	0.304502	0.0204692	0.27043
MAX_160dpf WT KdrlmTur Flt4mCit FliGFP Lyve1DsRed 35mm 7b.tif	1.35011e+06	37739.5	280995	28669	270216	0.0279529	0.208127	0.0212345	0.200144
MAX_160dpf WT KdrlmTur Flt4mCit FliGFP Lyve1DsRed 35mm 7.tif	1.07539e+06	38746.7	266379	12270.3	217302	0.0360303	0.247703	0.01141	0.202067	0.0319916	0.227915	0.0163223	0.201105
MAX_160dpf WT KdrlmTur Flt4mCit FliGFP Lyve1DsRed 35mm 6b.tif	1.5368e+06	10292.3	300024	11188.4	291457	0.00669718	0.195226	0.0072803	0.189652
MAX_160dpf WT KdrlmTur Flt4mCit FliGFP Lyve1DsRed 35mm 6.tif	1.49066e+06	12166.9	377713	8722.09	374623	0.00816205	0.253386	0.00585114	0.251312	0.00742961	0.224306	0.00656572	0.220482
MAX_156dpf cxcr4aMut KdrlmTur Flt4mCit FliGFP 35mm 18b.tif	1.25637e+06	2780.34	256150	4553.48	3458.2	0.00221299	0.20388	0.00362431	0.00275252
MAX_156dpf cxcr4aMut KdrlmTur Flt4mCit FliGFP 35mm 18.tif	1.32274e+06	4764.12	491937	9585.68	7508.08	0.00360169	0.371907	0.00724682	0.00567614	0.00290734	0.287894	0.00543556	0.00421433
MAX_156dpf cxcr4aMut KdrlmTur Flt4mCit FliGFP 35mm 14b.tif	1.46402e+06	3833.51	215362	14175.5	194982	0.00261848	0.147103	0.00968263	0.133183
MAX_156dpf cxcr4aMut KdrlmTur Flt4mCit FliGFP 35mm 14.tif	1.33846e+06	629.982	473673	7180.64	395611	0.000470677	0.353895	0.00536486	0.295572	0.00154458	0.250499	0.00752375	0.214378
MAX_156dpf cxcr4aMut KdrlmTur Flt4mCit FliGFP 35mm 12b.tif	1.22799e+06	7121.28	295509	3105.87	294152	0.00579912	0.240644	0.00252922	0.239539
MAX_156dpf cxcr4aMut KdrlmTur Flt4mCit FliGFP 35mm 12.tif	1.2558e+06	651.045	327763	5434.31	237103	0.000518429	0.260998	0.00432735	0.188806	0.00315878	0.250821	0.00342829	0.214172
MAX_156dpf cxcr4aMut KdrlmTur Flt4mCit FliGFP 33mm 17b.tif	934613	340.841	201531	9103.14	57447	0.000364687	0.21563	0.00974001	0.0614661
MAX_156dpf cxcr4aMut KdrlmTur Flt4mCit FliGFP 33mm 17.tif	1.00233e+06	331.267	203530	3613.3	35531.7	0.000330498	0.203058	0.00360492	0.0354493	0.000347593	0.209344	0.00667246	0.0484577
MAX_156dpf cxcr4aMut KdrlmTur Flt4mCit FliGFP 33mm 16b.tif	1.36389e+06	436.583	451119	11196.1	45146.1	0.000320101	0.330758	0.0082089	0.0331009
MAX_156dpf cxcr4aMut KdrlmTur Flt4mCit FliGFP 33mm 16.tif	1.33621e+06	1484	453623	5685.15	133156	0.0011106	0.339485	0.00425469	0.0996521	0.000715353	0.335122	0.00623179	0.0663765
MAX_156dpf cxcr4aMut KdrlmTur Flt4mCit FliGFP 33mm 15b.tif	1.13087e+06	2140.79	289343	5541.54	270888	0.00189304	0.255858	0.00490023	0.239539
MAX_156dpf cxcr4aMut KdrlmTur Flt4mCit FliGFP 33mm 15.tif	1.1019e+06	3632.45	530291	1461.02	521477	0.00329652	0.48125	0.00132591	0.473252	0.00259478	0.368554	0.00311307	0.356395
MAX_156dpf cxcr4aMut KdrlmTur Flt4mCit FliGFP 33mm 13b.tif	1.22983e+06	3136.5	305633	12588.1	255259	0.00255036	0.248517	0.0102357	0.207557
MAX_156dpf cxcr4aMut KdrlmTur Flt4mCit FliGFP 33mm 13.tif	1.09942e+06	1717.61	220000	4155.2	157689	0.00156229	0.200106	0.00377946	0.14343	0.00205633	0.224312	0.00700759	0.175494
121dpf cxcr4aMut KdrlmTur Flt4mCit FliGFP32mm 9 max.lsm	1.19233e+06	4036.48	475542	5386.44	78824.3	0.00338537	0.398834	0.00451757	0.0661094
121dpf cxcr4aMut KdrlmTur Flt4mCit FliGFP32mm 9b max.lsm	1.10774e+06	12366	388141	976.567	51641.2	0.0111633	0.350389	0.000881583	0.0466184	0.00727431	0.374612	0.00269958	0.0563639
121dpf cxcr4aMut KdrlmTur Flt4mCit FliGFP33mm 10 max.lsm	1.06166e+06	2630.99	130672	7969.55	12130.5	0.00247818	0.123083	0.00750669	0.011426
121dpf cxcr4aMut KdrlmTur Flt4mCit FliGFP33mm 10b max.lsm	968973	2228.87	241518	10012.7	22989.5	0.00230024	0.249252	0.0103333	0.0237257	0.00238921	0.186167	0.00891999	0.0175758
121dpf cxcr4aMut KdrlmTur Flt4mCit FliGFP34mm 8 max.lsm	1.13254e+06	6137.05	410120	6868.52	39604.6	0.00541882	0.362123	0.00606468	0.0349696
121dpf cxcr4aMut KdrlmTur Flt4mCit FliGFP34mm 8b max.lsm	1.30087e+06	32.552	372853	9713.97	66069.5	2.50232e-05	0.286618	0.00746727	0.0507886	0.00272192	0.32437	0.00676598	0.0428791
121dpf cxcr4aMut KdrlmTur Flt4mCit FliGFP35mm 6 max.lsm	1.19676e+06	160.846	385495	19246	147523	0.000134401	0.322116	0.0160818	0.123269
121dpf cxcr4aMut KdrlmTur Flt4mCit FliGFP35mm 6b max.lsm	1.13695e+06	264.248	284930	20530.9	136658	0.000232419	0.250609	0.0180579	0.120197	0.00018341	0.286363	0.0170698	0.121733
121dpf cxcr4aMut KdrlmTur Flt4mCit FliGFP35mm 7 max.lsm	1.17973e+06	1388.26	400791	4532.42	25959.4	0.00117676	0.339731	0.00384191	0.0220045
121dpf cxcr4aMut KdrlmTur Flt4mCit FliGFP35mm 7b max.lsm	1.07272e+06	1759.73	230954	3004.38	17220.1	0.00164044	0.215298	0.00280072	0.0160528	0.0014086	0.277514	0.00332131	0.0190287
122dpf cxcr4aMut KdrlmTur Flt4mCit FliGFP33mm 11 max.lsm	1.15125e+06	1696.55	310701	7307.02	30287	0.00147366	0.269883	0.00634705	0.026308
122dpf cxcr4aMut KdrlmTur Flt4mCit FliGFP33mm 11b max.lsm	1.41247e+06	172.335	521588	3791.38	35870.6	0.00012201	0.369274	0.00268422	0.0253957	0.000797835	0.319578	0.00451563	0.0258518
