# Supplementary material for: Late developing cardiac lymphatic vasculature supports adult zebrafish heart function and regeneration
Source: eLife. 2019 Nov 8;8:e42762. doi: 10.7554/eLife.42762 (PMC6881116; doi:10.7554/eLife.42762)
Supplement: Figure 4—figure supplement 1—source data 1. [file elife-42762-fig4-figsupp1-data1.xlsx]

## Sheet: Replicate 1
	ef1a	vegfc
wt	18.38	26.24
	18.56	26.14		Vegfc expression (Replicate 1)
	18.5	26.11
Ave	18.48	26.1633
Nor		7.68333
		0
ratio		1
3dpc	18.51	24.37
	18.52	24.61
	18.58	24.65
Ave	18.5367	24.5433
Nor		6.00667
		-1.67667				Uncut	3dpc	7dpc	14dpc	28dpc	42dpc	14dpa
ratio		3.19688			vegfc	1	3.19688	1.33176	0.775572	1.26576	2.02324	1.0163
7dpc	18.16	25.66
	18.32	25.68
	18.72	25.67
Ave	18.4	25.67
Nor		7.27
		-0.413333
ratio		1.33176
14dpc	18.5	26.19
	17.88	26.24
	18.35	26.45
Ave	18.2433	26.2933
Nor		8.05
		0.366667
ratio		0.775572
28dpc	18.53	26.29
	18.85	26.46
	18.52	26.28
Ave	18.6333	26.3433
Nor		7.71
		-0.34
ratio		1.26576
42dpc	19.21	26.05
	18.92	25.97
	19.11	26.32
Ave	19.08	26.1133
Nor		7.03333
		-1.01667
ratio		2.02324
14dpa	18.89	27
	18.87	26.88
	18.75	26.71
Ave	18.8367	26.8633
Nor		8.02667
		-0.0233333
ratio		1.0163

## Sheet: Replicate 2
	ef1a	vegfc
wt	18.91	26.14
	18.65	25.99		Vegfc expression (Replicate 2)
	18.73	26.15
Ave	18.7633	26.0933
Nor		7.33
		0
ratio		1
3dpc	18.62	24.55
	18.59	24.58
	18.75	24.4
Ave	18.6533	24.51
Nor		5.85667
		-1.47333
ratio		2.77663
7dpc	18.35	25.59
	18.61	25.68
	18.28	25.52
Ave	18.4133	25.5967
Nor		7.18333
		-0.146667
ratio		1.10701
14dpc	18.28	26.26
	18.11	26.38
	18.39	26.36
Ave	18.26	26.3333
Nor		8.07333
		0.743333				Uncut	3dpc	7dpc	14dpc	28dpc	42dpc	14dpa
ratio		0.597358			vegfc	1	2.77663	1.10701	0.597358	1.08172	1.76541	0.97041
28dpc	18.48	26.62
	18.17	26.18
	18.58	26.31
Ave	18.41	26.37
Nor		7.96
		-0.113333
ratio		1.08172
42dpc	19.17	26.38
	19.04	26.16
	19.17	26.6
Ave	19.1267	26.38
Nor		7.25333
		-0.82
ratio		1.76541
14dpa	18.81	27.07
	18.85	26.97
	18.95	26.92
Ave	18.87	26.9867
Nor		8.11667
		0.0433333
ratio		0.97041

## Sheet: Replicate 3
	ef1a	vegfc
wt	18.71	25.94
	18.93	25.68		Vegfc expression (Replicate 3)
	18.51	25.97
Ave	18.7167	25.8633
Nor		7.14667
		0
ratio		1
3dpc	18.7	24.14
	18.45	24.26
	18.67	24.22				Uncut	3dpc	7dpc	14dpc	28dpc	42dpc	14dpa
Ave	18.6067	24.2067			vegfc	1	2.92141	1.09429	0.533416	1.18372	1.97247	1.12506
Nor		5.6
		-1.54667
ratio		2.92141
7dpc	18.26	25.38
	18.52	25.33
	18.03	25.15
Ave	18.27	25.2867
Nor		7.01667
		-0.13
ratio		1.09429
14dpc	18.19	26.11
	18.14	26.29
	17.77	25.86
Ave	18.0333	26.0867
Nor		8.05333
		0.906667
ratio		0.533416
28dpc	18.35	26.23
	17.82	26.07
	18.77	26.07
Ave	18.3133	26.1233
Nor		7.81
		-0.243333
ratio		1.18372
42dpc	18.95	26.19
	18.96	26.08
	19.31	26.17
Ave	19.0733	26.1467
Nor		7.07333
		-0.98
ratio		1.97247
14dpa	18.89	26.72
	19.05	27
	18.99
Ave	18.9767	26.86
Nor		7.88333
		-0.17
ratio		1.12506
