# Supplementary material for: Late developing cardiac lymphatic vasculature supports adult zebrafish heart function and regeneration
Source: eLife. 2019 Nov 8;8:e42762. doi: 10.7554/eLife.42762 (PMC6881116; doi:10.7554/eLife.42762)
Supplement: Figure 4—source data 1. [file elife-42762-fig4-data1.xlsx]

## Sheet: Figure 4i
Lymphatic Area				Percentage coverage (600um^2)
	Uncut	60dpa	60dpc		Uncut	60dpa	60dpc
Heart 1	4241.36	6035.57	10765.2		1.17816	1.67655	2.99034
Heart 2	9541.63	7709.13	16653.3		2.65045	2.14143	4.62593
Heart 3	794.657	3021.61	16645.7		0.220738	0.839337	4.6238
Heart 4	325.522	8848.46	25314.2		0.0904228	2.45791	7.03171
Heart 5		6646.4	18148.8			1.84622	5.04134
Heart 6		1351.88	24253.3			0.375521	6.73704
Heart 7		5794.3	65975.7			1.60953	18.3266
Heart 8			29982.5				8.32848
Heart 9			9857.58				2.73822
Average	3725.79	5629.62	24177.4		1.03494	1.56378	6.71594
			Lymphatic coverage within wound region
