# Supplementary material for: Late developing cardiac lymphatic vasculature supports adult zebrafish heart function and regeneration
Source: eLife. 2019 Nov 8;8:e42762. doi: 10.7554/eLife.42762 (PMC6881116; doi:10.7554/eLife.42762)
Supplement: Figure 4—source data 2. [file elife-42762-fig4-data2.xlsx]

## Sheet: Figure 4ii
File name (Flt4)	Branch	Length	Branch per mm	Average
60dpc 562dpf 44mm Flt4FliFlt1 9l max.lsm
60dpc 562dpf 44mm Flt4FliFlt1 9a max.lsm
60dpc 562dpf 35mm Flt4FliFlt1 8l max.lsm	27	5349.46	0.00504724	0.00455606	Lymphatic bifurcations over ventricle
60dpc 562dpf 35mm Flt4FliFlt1 8a max.lsm	16	3936.16	0.00406488
60dpc 560dpf 43mm Flt4FliFlt1 5l max.lsm	15	2888.89	0.00519231	0.00658013
60dpc 560dpf 43mm Flt4FliFlt1 5a max.lsm	12	1506.04	0.00796794
60dpc 560dpf 40mm Flt4FliFlt1 7l max.lsm	49	10991.4	0.00445802	0.00445802
60dpc 560dpf 40mm Flt4FliFlt1 7a max.lsm
60dpc 560dpf 40mm Flt4FliFlt1 6l max.lsm	28	7721.56	0.00362621	0.00362621
60dpc 560dpf 40mm Flt4FliFlt1 6a max.lsm
60dpc 560dpf 39mm Flt4FliFlt1 3l max.lsm	16	4834.36	0.00330964	0.00330964
60dpc 560dpf 39mm Flt4FliFlt1 3a max.lsm
60dpc 560dpf 39mm Flt4FliFlt1 2l max.lsm	5	2942.43	0.00169927	0.00303579
60dpc 560dpf 39mm Flt4FliFlt1 2a max.lsm	6	1372.27	0.0043723
60dpc 560dpf 37mm Flt4FliFlt1 4l max.lsm	23	7784.88	0.00295445	0.00295445
60dpc 560dpf 37mm Flt4FliFlt1 4a max.lsm
60dpc 560dpf 33mm Flt4FliFlt1 1l max.lsm	7	2304.68	0.0030373	0.0030373
60dpc 560dpf 33mm Flt4FliFlt1 1a max.lsm
Uncut 568dpf 42mm Flt4FliFlt1 12l max.lsm	7	3578.22	0.00195628	0.00195628
Uncut 568dpf 42mm Flt4FliFlt1 12a max.lsm
Uncut 568dpf 40mm Flt4FliFlt1 13l max.lsm	15	3225.94	0.00464981	0.00457784
Uncut 568dpf 40mm Flt4FliFlt1 13a max.lsm	9	1997.39	0.00450588
Uncut 568dpf 39mm Flt4FliFlt1 10l max.lsm	3	1936.41	0.00154926	0.00151572
Uncut 568dpf 39mm Flt4FliFlt1 10a max.lsm	1	674.679	0.00148219
Uncut 568dpf 36mm Flt4FliFlt1 11l max.lsm	15	5474.49	0.00273998	0.00273998
Uncut 568dpf 36mm Flt4FliFlt1 11a max.lsm
Uncut 41mm Flt4FliProx1Kdrl 20l max.lsm	4	1708.45	0.0023413	0.0023413
Uncut 41mm Flt4FliProx1Kdrl 20a max.lsm
Uncut 33mm Flt4FliProx1Kdrl 20l max.lsm	1	1272.12	0.000786092	0.000786092
Uncut 33mm Flt4FliProx1Kdrl 21a max.lsm
60dpa 560dpf 42mm Flt4FliFlt1 7l max.lsm	20	7035.34	0.00284279	0.00284279
60dpa 560dpf 42mm Flt4FliFlt1 7a max.lsm
60dpa 560dpf 39mm Flt4FliFlt1 6l max.lsm	1	785.971	0.00127231	0.00127231
60dpa 560dpf 39mm Flt4FliFlt1 6a max.lsm
60dpa 560dpf 37mm Flt4FliFlt1 5l max.lsm	9	2630.66	0.00342119	0.00342119
60dpa 560dpf 37mm Flt4FliFlt1 5a max.lsm
60dpa 559dpf 42mm Flt4FliFlt1 4l max.lsm	7	3508.1	0.00199538	0.00199538
60dpa 559dpf 42mm Flt4FliFlt1 4a max.lsm
60dpa 559dpf 36mm Flt4FliFlt1 3l max.lsm	6	3043.7	0.00197129	0.00197129
60dpa 559dpf 36mm Flt4FliFlt1 3a max.lsm
60dpa 559dpf 36mm Flt4FliFlt1 2l max.lsm	9	3386.84	0.00265734	0.00265734
60dpa 559dpf 36mm Flt4FliFlt1 2a max.lsm
60dpa 559dpf 36mm Flt4FliFlt1 1l max.lsm	5	1518.3	0.00329315	0.00329315
