# Supplementary material for: Late developing cardiac lymphatic vasculature supports adult zebrafish heart function and regeneration
Source: eLife. 2019 Nov 8;8:e42762. doi: 10.7554/eLife.42762 (PMC6881116; doi:10.7554/eLife.42762)
Supplement: Figure 5—source data 1. [file elife-42762-fig5-data1.xlsx]

## Sheet: Figure 5
	Uninjured	1dpc	7dpc
	0	90	16
	1	118	35		Mpx-positive cells assoiated with lymphatic vessels on the BA
		38	14
	14	138	21
	2.5		35.5
	5.5
Average	4.6	96	24.3
	Uninjured	1dpc	7dpc
	9	30	23
	11	16	29
		36	20		IB4-positive cells assoiated with lymphatic vessels on the BA
	7	41	12
	2.5		12
	5.5
Average	7	30.75	19.2
