# Supplementary material for: Late developing cardiac lymphatic vasculature supports adult zebrafish heart function and regeneration
Source: eLife. 2019 Nov 8;8:e42762. doi: 10.7554/eLife.42762 (PMC6881116; doi:10.7554/eLife.42762)
Supplement: Figure 6—figure supplement 1—source data 1. [file elife-42762-fig6-figsupp1-data1.xlsx]

## Sheet: Figure 6i
	Lyve1b Area	Ventrical Area	Percentage	Heart Average (2 sides)
NonHS	80155.1	982599	8.15746	8.15746
	591.685	789821	0.0749139	0.0749139
	25478.8	759355	3.35532	3.35532
	56019.5	691690	8.09893	6.43893
	41153.6	861147	4.77893
	40015.5	804516	4.97385	6.58257
	70577.4	861616	8.19128
	34553.1	728425	4.74354	3.66388		Lyve1b coverage of the ventricle in Non-Heat shocked control, Heat shocked Tg(sFlt4) and non-transgenic sibling zebrafish
	20367.3	788140	2.58422
	26503.5	604896	4.38149	4.94215
	40848.7	742326	5.5028
HS nonTg	97346.6	1.0316e+06	9.43649	8.46629
	83581.3	1.115e+06	7.4961
	57749.6	546701	10.5633	8.59093
	45515.7	687695	6.61859
	73935.7	772101	9.57591	9.84959
	86276.8	852263	10.1233
HS sFlt4	8301.38	718478	1.15541	0.579544
	26.577	723052	0.00367567
	475.258	837586	0.0567414	0.0299971
	31.267	961223	0.00325283
	367.387	602604	0.0609666	0.061883
	373.64	594973	0.0627995
	590.946	804585	0.0734473	2.81224
	40362.5	727118	5.55103
	231.376	770536	0.0300279	0.0238053
	143.828	818008	0.0175827
	2981.31	821502	0.362909	0.183108
	26.577	803513	0.0033076
	13487	868367	1.55315	1.19395
	8392.06	1.00534e+06	0.834747
