# Supplementary material for: Late developing cardiac lymphatic vasculature supports adult zebrafish heart function and regeneration
Source: eLife. 2019 Nov 8;8:e42762. doi: 10.7554/eLife.42762 (PMC6881116; doi:10.7554/eLife.42762)
Supplement: Figure 6—figure supplement 1—source data 2. [file elife-42762-fig6-figsupp1-data2.xlsx]

## Sheet: Figure 6ii
	Kdrl Area	Ventrical Area	Percentage	Heart Average (2 sides)
HS nonTg	190050	968727	19.6185	14.428
	99271.1	1.07465e+06	9.23756
	68030.3	533150	12.7601	10.5464
	56449.4	677441	8.33274
	111327	788719	14.1149	15.2286
	134102	820580	16.3423			Kdrl coverage of the ventricle in Heat shocked Tg(sFlt4) and non-transgenic sibling zebrafish
HS sFlt4	46611.2	596479	7.8144	6.9993
	36698	593416	6.1842
	164077	711405	23.0637	19.8841
	121411	726823	16.7044
	83354.6	787950	10.5787	9.01288
	72034.4	967283	7.44709
	96935.4	717024	13.5191	8.17644
	23580	832116	2.83374
	126172	758587	16.6325	13.7361
	91702.9	845986	10.8398
	26767.7	827243	3.23577	9.71828
	132469	817669	16.2008
	38255.1	882116	4.33675	5.41145
	57215.4	882116	6.48615
