# Supplementary material for: Late developing cardiac lymphatic vasculature supports adult zebrafish heart function and regeneration
Source: eLife. 2019 Nov 8;8:e42762. doi: 10.7554/eLife.42762 (PMC6881116; doi:10.7554/eLife.42762)
Supplement: Figure 6—figure supplement 1—source data 3. [file elife-42762-fig6-figsupp1-data3.xlsx]

## Sheet: Sheet1
Sample	Mef2	non-CM	Area	Threshold
sFlt4 71dpf and 92dpf Heatshock
HS71dpf 226dpf sFLT4 uninj #2 image 1	124	192	64369.2	9,40
HS71dpf 226dpf sFLT4 uninj #2 image 2	141	156	66958	7124
HS71dpf 226dpf sFLT4 uninj #2 image 3	128	136	68476.5	9123
HS71dpf 226dpf sFLT4 uninj #2 AVG	131	161.33	66601.2
HS71dpf 226dpf sFLT4 uninj #1 image 1	34	123	67431	12106
HS71dpf 226dpf sFLT4 uninj #1 image 2	83	98	69326.7	13104
HS71dpf 226dpf sFLT4 uninj #1 image 3	72	123	64614.3	16112
HS71dpf 226dpf sFLT4 uninj #1 AVG	63	114.67	67124
HS71 dpf 226dpf sFLT4 uninj #4 image 1	106	57	70864.3	30255
HS71 dpf 226dpf sFLT4 uninj #4 image 2	107	69	69374.5	22160
HS71 dpf 226dpf sFLT4 uninj #4 image 3	66	99	67166.7	18161
HS71 dpf 226dpf sFLT4 uninj #4 AVG	93	75	69135.2
HS92dpf 259 dpf sFLT4 35mm image 1	128	122	54936.7	22225
HS92dpf 259 dpf sFLT4 35mm image 2	103	93	65860.8	16255
HS92dpf 259 dpf sFLT4 35mm image 3	96	124	55051.6	20255
HS92dpf 259 dpf sFLT4 35mm AVG	109	113	58616.4
HS92dpf 259 dpf 33mm sFLT4 image 1	97	79	35213.9	15255
HS92dpf 259 dpf 33mm sFLT4 image 2	93	88	40964.1	18255
HS92dpf 259 dpf 33mm sFLT4 image 3	94	102	31135.3	15255
HS92dpf 259 dpf 33mm sFLT4 AVG	94.67	89.67	35771.1
nonTg 71dpf and 92dpf Heatshock
non TG 226 dpf uninj #1 image 1	94	63	45310.8	15141
non TG 226 dpf uninj #1 image 2	111	64	55017.1	11255
non TG 226 dpf uninj #1 image 3	95	66	49544.5	12255
non TG 226 dpf uninj #1 AVG	100	64.33	49957.5
non TG 226 dpf uninj #2 image 1	64	76	68022.7	35255
non TG 226 dpf uninj #2 image 2	57	58	71170.7	30255
non TG 226 dpf uninj #2 image 3	59	54	69734.5	30255
non TG 226 dpf uninj #2 AVG	60	62.67	69642.6
non TG 226 dpf uninj #3 image 1	51	78	45695.7	15255
non TG 226 dpf uninj #3 image 2	92	63	38352.3	22255
non TG 226 dpf uninj #3 image 3	73	71	44200.2	22255
non TG 226 dpf uninj #3 AVG	72	70.67	42749.4
non TG 226 dpf uninj #4 image 1	122	69	64553	27255
non TG 226 dpf uninj #4 image 2	118	77	64221.7	26255
non TG 226 dpf uninj #4 image 3	75	72	67800.6	21255
non TG 226 dpf uninj #4 AVG	105	72.67	65525.1
HS92dpf 259 dpf 32mm non TG image 1	146	100	49492.8	15255
HS92dpf 259 dpf 32mm non TG image 2	105	108	45513.8	15255
HS92dpf 259 dpf 32mm non TG image 3	97	89	40154.1	12255
HS92dpf 259 dpf 32mm non TG AVG	116	99	45053.6
