# Supplementary material for: Late developing cardiac lymphatic vasculature supports adult zebrafish heart function and regeneration
Source: eLife. 2019 Nov 8;8:e42762. doi: 10.7554/eLife.42762 (PMC6881116; doi:10.7554/eLife.42762)
Supplement: Figure 6—figure supplement 1—source data 4. [file elife-42762-fig6-figsupp1-data4.xlsx]

## Sheet: Sheet1
Sample/file	Body Length	Ventricle Area mm^2	VA to BL ratio
14dpc (Post-injury HS)
n7 sflt4(non tag)-fli-lyve1 4x mag.tif	36	0.511891	0.0142192
n8 sflt4(non tag)-fli-lyve1 4x mag.tif	35	0.528256	0.015093
n9 sflt4(non tag)-fli-lyve1 4x mag.tif	35	0.519122	0.0148321
n10 sflt4 (non tag)-fli-lyve1 4x mag.tif	39	0.574384	0.0147278
S1sflt4-fli-lyve1 4X mag.tif	31	0.40152	0.0129523
S2 sflt4-fli-lyve1 4x mag.tif	31	0.347934	0.0112237
S3 sflt4-fli-lyve1 4x mag.tif	36	0.712765	0.019799
S4 sflt4-fli-lyve1 4x mag.tif	35	0.650958	0.0185988
S5 sflt4-fli-lyve1 4x mag.tif	36	0.634973	0.0176381
S6 sflt4-fli-lyve1 4x mag.tif	34	0.516839	0.0152011
nonTg 14dpc Average	0.014718
sFlt4 14dpc Average	0.0159022
56dpc (Post-injury HS)
NC 1 nonTG-fli-lyve1 56 dpc 4x mag.tif	34	0.659102	0.0193854
NC 2 nonTG-fli-lyve1 56 dpc 4x mag.tif	30	0.534193	0.0178064
NC 3 nonTG-fli-lyve1 56 dpc 4x mag.tif	35	0.861804	0.024623
NC 4 nonTG-fli-lyve1 56 dpc 4x mag.tif	34	0.553299	0.0162735
NC 5 nonTG-fli-lyve1 56 dpc 4x mag.tif	34	0.658494	0.0193675
NC 6 nonTG-fli-lyve1 56 dpc 4x mag.tif	36	0.716571	0.0199048
TC 1 HS sflt4-fli-lyve1 57 dpc 4x mag.tif	36	0.790177	0.0219494
TC 2 HS sflt4-fli-lyve1 57 dpc 4x mag.tif	35	0.593641	0.0169612
TC 3 HS sflt4-fli-lyve1 57 dpc 4x mag.tif	35	0.825496	0.0235856
TC 4 HS sflt4-fli-lyve1 57 dpc 4x mag.tif	32	0.540816	0.0169005
TC 5 HS sflt4-fli-lyve1 57 dpc 4x mag.tif	32	0.562281	0.0175713
TC 6 HS sflt4-fli-lyve1 57 dpc 4x mag.tif	32	0.471473	0.0147335
nonTg 56dpc Average	0.0195601
sFlt4 56dpc Average	0.0186169
60dpc (Developmental HS)
C3 HS 4x mag.tif	38	0.82207	0.0216334
C4 HS 4x mag.tif	34	0.606429	0.0178361
C5 HS 4x mag.tif	33	0.629493	0.0190755
C6 HS 4x mag.tif	36	0.70797	0.0196658
C7 HS 4x mag.tif	32	0.528713	0.0165223
C8 HS 4x mag.tif	35	0.761861	0.0217675
C9 sflt4 4x mag.tif	37	0.679502	0.0183649
C10 sflt4 4x mag.tif	35	0.696172	0.0198906
C11 sflt4 4x mag.tif	37	0.628351	0.0169825
C12 sflt4 4x mag.tif	34	0.756305	0.0222443
C13 sflt4 4x mag.tif	31	0.505954	0.0163211
C14 sflt4 4x mag.tif	35	0.395659	0.0113046
nonTg 60dpc Average	0.0194168
sFlt4 60dpc Average	0.017518
21dpc (Developmental HS)
HSsFlt Lyve Kdrl 251dpf HS71to230 21dpc H1 36mm.lsm	36	0.577	0.0160278
HSsFlt Lyve Kdrl 251dpf HS71to230 21dpc H2 35mm.lsm	35	0.552	0.0157714
HSsFlt Lyve Kdrl 251dpf HS71to230 21dpc H3 34mm.lsm	34	0.607	0.0178529
HSsFlt Lyve Kdrl 251dpf HS71to230 21dpc H4 34mm.lsm	34	0.621	0.0182647
HSsFlt Lyve Kdrl 251dpf HS71to230 21dpc H5 32mm.lsm	32
HSsFlt Lyve Kdrl 251dpf HS71to230 21dpc H6 35mm.lsm	35	0.453	0.0129429
nonTg Lyve Kdrl 251dpf HS71to230 21dpc n1 33mm.lsm	33	0.847	0.0256667
nonTg Lyve Kdrl 251dpf HS71to230 21dpc n2 22mm.lsm	22	0.2	0.00909091
nonTg Lyve Kdrl 251dpf HS71to230 21dpc n3 39mm.lsm	39	0.54	0.0138462
nonTg Lyve Kdrl 251dpf HS71to230 21dpc n4 32mm.lsm	32	0.575	0.0179687
nonTg Lyve Kdrl 251dpf HS71to230 21dpc n5 34mm.lsm	34	0.778	0.0228824
nonTg 21dpc Average	0.017891
sFlt4 21dpc Average	0.0161719
