# Supplementary material for: Late developing cardiac lymphatic vasculature supports adult zebrafish heart function and regeneration
Source: eLife. 2019 Nov 8;8:e42762. doi: 10.7554/eLife.42762 (PMC6881116; doi:10.7554/eLife.42762)
Supplement: Figure 6—figure supplement 2—source data 1. [file elife-42762-fig6-figsupp2-data1.xlsx]

## Sheet: Sheet1
Title/Sample	Number of sprouts	Injured Area	Vessel Area	Injured Area mm^2	sprouts/area mm^2	% coverage
sFlt4
HSsFlt Lyve Kdrl 251dpf HS71to230 21dpc H1 36mm.lsm	12	557690	58844.4	0.55769	21.5173	10.5515
HSsFlt Lyve Kdrl 251dpf HS71to230 21dpc H1b 36mm.lsm
HSsFlt Lyve Kdrl 251dpf HS71to230 21dpc H2 35mm.lsm	15	289107	69994.2	0.289107	51.8839	24.2105
HSsFlt Lyve Kdrl 251dpf HS71to230 21dpc H2b 35mm.lsm
HSsFlt Lyve Kdrl 251dpf HS71to230 21dpc H3 34mm.lsm	11	403557	93088	0.403557	27.2576	23.0669
HSsFlt Lyve Kdrl 251dpf HS71to230 21dpc H3b 34mm.lsm
HSsFlt Lyve Kdrl 251dpf HS71to230 21dpc H4 34mm.lsm	3	46656.6	7829.25	0.0466566	64.2996	16.7806
HSsFlt Lyve Kdrl 251dpf HS71to230 21dpc H4b 34mm.lsm	4	61395.8	10562	0.0613958	65.151	17.2031
H4 Average	3.5	54026.2	9195.62	0.0540262	64.7253	16.9918
HSsFlt Lyve Kdrl 251dpf HS71to230 21dpc H5 32mm.lsm	7	203360	30454	0.20336	34.4216	14.9754
HSsFlt Lyve Kdrl 251dpf HS71to230 21dpc H5b 32mm.lsm
HSsFlt Lyve Kdrl 251dpf HS71to230 21dpc H6 35mm.lsm	3	130415	21311.6	0.130415	23.0036	16.3414
HSsFlt Lyve Kdrl 251dpf HS71to230 21dpc H6b 35mm.lsm
nonTg
nonTg Lyve Kdrl 251dpf HS71to230 21dpc n1 33mm.lsm	6	310469	69475.2	0.310469	19.3256	22.3775
nonTg Lyve Kdrl 251dpf HS71to230 21dpc n1b 33mm.lsm
nonTg Lyve Kdrl 251dpf HS71to230 21dpc n2 22mm.lsm	1	71263.7	20392.3	0.0712637	14.0324	28.6153
nonTg Lyve Kdrl 251dpf HS71to230 21dpc n2b 22mm.lsm
nonTg Lyve Kdrl 251dpf HS71to230 21dpc n3 39mm.lsm	4	198770	27571.2	0.19877	20.1237	13.8709
nonTg Lyve Kdrl 251dpf HS71to230 21dpc n3b 39mm.lsm	8	208870	41735.2	0.20887	38.3014	19.9814
n3 Average	6	203820	34653.2	0.20382	29.2126	16.9262
nonTg Lyve Kdrl 251dpf HS71to230 21dpc n4 32mm.lsm	2	220695	55649	0.220695	9.06229	25.2153
nonTg Lyve Kdrl 251dpf HS71to230 21dpc n4b 32mm.lsm
nonTg Lyve Kdrl 251dpf HS71to230 21dpc n5 34mm.lsm	6	194981	30704.2	0.194981	30.7723	15.7473
nonTg Lyve Kdrl 251dpf HS71to230 21dpc n5b 34mm.lsm	5	190260	58025.3	0.19026	26.2799	30.4979
n5 Average	5.5	192620	44364.7	0.19262	28.5261	23.1226
AVERAGE
14dpc 258dpf HSsflt4 Lyve1Kdrl	8.58333	273026	47148	0.273026	37.1349	17.6896
14dpc 258dpf nonTg Lyve1Kdrl	4.1	199773	44906.9	0.199773	20.0318	23.2514
