# Supplementary material for: Late developing cardiac lymphatic vasculature supports adult zebrafish heart function and regeneration
Source: eLife. 2019 Nov 8;8:e42762. doi: 10.7554/eLife.42762 (PMC6881116; doi:10.7554/eLife.42762)
Supplement: Figure 6—figure supplement 2—source data 2. [file elife-42762-fig6-figsupp2-data2.xlsx]

## Sheet: Figure 6iii
sFlt4	Scar Volume (mm^3)	nonTg	Scar Volume (mm^3)			Minimal Scar	Scar				sFlt4	Scar Volume (mm^3)	nonTg	Scar Volume (mm^3)
sFlt4 1	0.0181378	nonTg 1	0.000315186		sFlt4	0	5				sFlt4 1	0.0181378	nonTg 1	0.000315186
sFlt4 2	0.00945833	nonTg 2	0.000104355		nonTg	3	2				sFlt4 2	0.00945833	nonTg 2	0.000104355
sFlt4 3	0.0147034	nonTg 3	0.00477233								sFlt4 3	0.0147034	nonTg 3	0.00477233
sFlt4 4	0.0512427	nonTg 4	0.0360818				Outliers
sFlt4 5	0.0169258	nonTg 5	0.00891237								sFlt4 5	0.0169258	nonTg 5	0.00891237
Average	0.0220936	Average	0.0100372		Scar volume estimation from consecutive sections						Average	0.0148064	Average	0.00352606
	sFlt4 1					sFlt4 2				sFlt4 3				sFlt4 4				sFlt4 5				nonTg 1				nonTg 2				nonTg 3				nonTg 4				nonTg 5
	Area	Areax63	Total Volume um^3	Total Volume mm^3		Area	Areax63	Total Volume um^3	Total Volume mm^3	Area	Areax63	Total Volume um^3	Total Volume mm^3	Area	Areax63	Total Volume um^3	Total Volume mm^3	Area	Areax63	Total Volume um^3	Total Volume mm^3	Area	Areax63	Total Volume um^3	Total Volume mm^3	Area	Areax63	Total Volume um^3	Total Volume mm^3	Area	Areax63	Total Volume um^3	Total Volume mm^3	Area	Areax63	Total Volume um^3	Total Volume mm^3	Area	Areax63	Total Volume um^3	Total Volume mm^3
Ventricle	35700.7	2.24914e+06	2.86989e+08	0.286989		194021	1.22233e+07	4.127e+08	0.4127	115354	7.2673e+06	4.41593e+08	0.441593	97113	6.11812e+06	3.95135e+08	0.395135	69782	4.39627e+06	3.35252e+08	0.335252	80777.7	5.089e+06	2.97722e+08	0.297722	67297.4	4.23973e+06	3.73554e+08	0.373554	403794	2.5439e+07	3.38352e+08	0.338352	332427	2.09429e+07	2.62289e+08	0.262289	340887	2.14759e+07	3.33684e+08	0.333684
Scar	0	0	1.81378e+07	0.0181378		0	0	9.45833e+06	0.00945833		0	1.47034e+07	0.0147034		0	5.12427e+07	0.0512427		0	1.69258e+07	0.0169258		0	315186	0.000315186		0	104355	0.000104355		0	4.77233e+06	0.00477233		0	3.60818e+07	0.0360818		0	8.91237e+06	0.00891237
Ventricle	152199	9.58856e+06				316465	1.99373e+07			165919	1.04529e+07			214995	1.35447e+07			363077	2.28739e+07			650258	4.09663e+07			293070	1.84634e+07			637892	4.01872e+07			511300	3.22119e+07			512233	3.22707e+07
Scar	0	0				17429.5	1.09806e+06				0				0				0				0			535.308	33724.4				0				0				0
Ventricle	233563	1.47145e+07				413692	2.60626e+07			227035	1.43032e+07			345742	2.17817e+07			531753	3.35005e+07			644919	4.06299e+07			434442	2.73698e+07			619638	3.90372e+07			602690	3.79695e+07			514697	3.24259e+07
Scar	26876.5	1.69322e+06				44275.7	2.78937e+06				0			18220.7	1.1479e+06				0				0				0				0			55399.4	3.49016e+06				0
Ventricle	313856	1.97729e+07				495571	3.1221e+07			293012	1.84598e+07			373373	2.35225e+07			425543	2.68092e+07			545661	3.43767e+07			461099	2.90493e+07			581456	3.66317e+07			537079	3.3836e+07			103806	6.53978e+06
Scar	59893.9	3.77332e+06				47157.6	2.97093e+06				0			39491.6	2.48797e+06				0			1743.96	109870				0			15483.5	975463				0				0
Ventricle	318872	2.00889e+07				578120	3.64215e+07			356041	2.24306e+07			441825	2.7835e+07			233001	1.4679e+07			534191	3.3654e+07			462907	2.91632e+07			560047	3.5283e+07			544813	3.43232e+07			244340	1.53934e+07
Scar	45868.2	2.8897e+06				28637.3	1.80415e+06				0			83296	5.24765e+06				0				0			811.38	51116.9				0				0			27593.6	1.7384e+06
Ventricle	395209	2.48982e+07				599091	3.77427e+07			307846	1.93943e+07			505988	3.18772e+07			592590	3.73332e+07			672613	4.23746e+07			203979	1.28507e+07			632395	3.98409e+07			529595	3.33645e+07			481542	3.03371e+07
Scar	49487.4	3.11771e+06				12631.9	795812				0			136147	8.57725e+06				0				0				0				0			140345	8.84174e+06				0
Ventricle	477387	3.00754e+07				611645	3.85337e+07			411790	2.59428e+07			547058	3.44647e+07			459941	2.89763e+07			584193	3.68042e+07			371107	2.33797e+07			625122	3.93827e+07			504079	3.1757e+07			394415	2.48481e+07
Scar	26422	1.66459e+06				0	0				0			148078	9.32894e+06			619.476	39027				0				0				0			181422	1.14296e+07				0
Ventricle	487922	3.07391e+07				599269	3.7754e+07			414689	2.61254e+07			500436	3.15275e+07			590152	3.71796e+07			446279	2.81156e+07			454814	2.86533e+07			492211	3.10093e+07			369420	2.32735e+07			531501	3.34845e+07
Scar	10231.5	644582				0	0				0			133608	8.41732e+06			79902.4	5.03385e+06			3258.99	205316				0			37454.8	2.35965e+06			144496	9.10326e+06				0
Ventricle	482256	3.03821e+07				686582	4.32547e+07			372662	2.34777e+07			635788	4.00547e+07			646171	4.07088e+07			316515	1.99405e+07			493157	3.10689e+07			386543	2.43522e+07			231913	1.46105e+07			339584	2.13938e+07
Scar	0	0				0	0				0			121256	7.63911e+06			83716.9	5.27416e+06				0				0			21260.8	1.33943e+06			51063	3.21697e+06			56109.8	3.53491e+06
Ventricle	392391	2.47206e+07				650019	4.09512e+07			419921	2.6455e+07			580480	3.65702e+07			676165	4.25984e+07			50032.8	3.15207e+06			466466	2.93873e+07			268422	1.69106e+07				0			395415	2.49111e+07
Scar	0	0				0	0				0			69044.7	4.34982e+06			22190.1	1.39797e+06				0				0			1552.06	97779.7				0			36518.8	2.30069e+06
Ventricle	457456	2.88198e+07				592886	3.73518e+07			416891	2.62641e+07			436862	2.75223e+07			648955	4.08842e+07			200310	1.26195e+07			399226	2.51512e+07			163141	1.02779e+07				0			476960	3.00485e+07
Scar	0	0				0	0				0			15655.2	986281			2333.14	146988				0				0				0				0			21244	1.33837e+06
Ventricle	75421.3	4.75154e+06				454578	2.86384e+07			511115	3.22003e+07			548392	3.45487e+07				0				0			424870	2.67668e+07				0				0			474054	2.98654e+07
Scar	0	0				0	0				0			25617.4	1.61389e+06				0				0				0				0				0				0
Ventricle	283451	1.78574e+07				316552	1.99428e+07			630139	3.96987e+07			213756	1.34667e+07				0				0			290127	1.8278e+07				0				0			487131	3.06892e+07
Scar	0	0				0	0				0			9689.42	610433				0				0				0				0				0				0
Ventricle	449696	2.83309e+07				42299.5	2.66487e+06			566858	3.57121e+07			331730	2.0899e+07			83716.9	5.27416e+06				0			97163.5	6.1213e+06				0				0				0
Scar	69122.1	4.35469e+06				0	0				0			5561.82	350395			79902.4	5.03385e+06				0				0				0				0				0
Ventricle										592886	3.73518e+07			360518	2.27127e+07			619.476	39027				0			426560	2.68733e+07				0				0				0
Scar										45306	2.85427e+06			7709.79	485717				0				0				0				0				0				0
Ventricle										549644	3.46276e+07			137931	8.68966e+06				0				0			380971	2.40012e+07				0				0				0
Scar										87693	5.52466e+06				0				0				0			309.738	19513.5				0				0				0
Ventricle										466617	2.93969e+07				0				0				0			202178	1.27372e+07				0				0				0
Scar										89234.9	5.6218e+06				0				0				0				0				0				0				0
Ventricle										191001	1.2033e+07				0				0				0				0				0				0				0
Scar										11153.9	702698				0				0				0				0				0				0				0
