# Supplementary material for: Late developing cardiac lymphatic vasculature supports adult zebrafish heart function and regeneration
Source: eLife. 2019 Nov 8;8:e42762. doi: 10.7554/eLife.42762 (PMC6881116; doi:10.7554/eLife.42762)
Supplement: Figure 6—figure supplement 2—source data 3. [file elife-42762-fig6-figsupp2-data3.xlsx]

## Sheet: Figure 6iv
Title		IB4	Mpx	Average IB4	Average Mpx	Wound area (plus 100um)	IB4/mm^2	Mpx/mm^2	Average IB4	Average Mpx	Wound area (mm^2)
RGB_14dpc nonTg DAPI Fli IB4 Mpx Bac N7 1 unmix.tif	Total	5	10			282483	17.7002	35.4004			0.282483
RGB_14dpc nonTg DAPI Fli IB4 Mpx Bac N7 2 unmix.tif	Total	13	15			388484	33.4634	38.6116			0.388484
RGB_14dpc nonTg DAPI Fli IB4 Mpx Bac N7 3 unmix.tif	Total	16	9			329225	48.5989	27.3369			0.329225
RGB_14dpc nonTg DAPI Fli IB4 Mpx Bac N7 4 unmix.tif	Total	4	17	9.5	12.75	374028	10.6944	45.4512	27.6142	36.7	0.374028
RGB_14dpc nonTg DAPI Fli IB4 Mpx Bac N8 1 unmix.tif	Total	16	13			315121	50.7741	41.2539			0.315121
RGB_14dpc nonTg DAPI Fli IB4 Mpx Bac N8 2 unmix.tif	Total	5	11			308964	16.1831	35.6028			0.308964
RGB_14dpc nonTg DAPI Fli IB4 Mpx Bac N8 3 unmix.tif	Total	18	22			294244	61.1737	74.7679			0.294244
RGB_14dpc nonTg DAPI Fli IB4 Mpx Bac N8 4 unmix.tif	Total	18	14	14.25	15	273269	65.8692	51.2316	48.5	50.7141	0.273269	14dpc nonTg wound-site IB4 and Mpx
RGB_14dpc nonTg DAPI Fli IB4 Mpx Bac N9 1 unmix.tif	Total	16	14			174651	91.6113	80.1599			0.174651
RGB_14dpc nonTg DAPI Fli IB4 Mpx Bac N9 2 unmix.tif	Total	16	22			150780	106.115	145.908			0.15078
RGB_14dpc nonTg DAPI Fli IB4 Mpx Bac N9 3 unmix.tif	Total	10	14	14	16.6667	192667	51.903	72.6642	83.2097	99.5773	0.192667
RGB_14dpc nonTg DAPI Fli IB4 Mpx Bac N10 1 unmix.tif	Total	9	0			277647	32.4152	0			0.277647
RGB_14dpc nonTg DAPI Fli IB4 Mpx Bac N10 2 unmix.tif	Total	15	2			298322	50.2812	6.70416			0.298322
RGB_14dpc nonTg DAPI Fli IB4 Mpx Bac N10 3 unmix.tif	Total	15	4	13	2	261287	57.4082	15.3088	46.7015	7.33767	0.261287
RGB_14dpc nonTg DAPI Fli IB4 Mpx Bac N11 1 unmix.tif	Total	9	3			175148	51.3852	17.1284			0.175148
RGB_14dpc nonTg DAPI Fli IB4 Mpx Bac N11 2 unmix.tif	Total	21	6			115436	181.918	51.9766			0.115436
RGB_14dpc nonTg DAPI Fli IB4 Mpx Bac N11 3 unmix.tif	Total	10	0			166257	60.1478	0			0.166257
RGB_14dpc nonTg DAPI Fli IB4 Mpx Bac N11 4 unmix.tif	Total	8	0	12	2.25	143081	55.9124	0	87.3409	17.2763	0.143081
RGB_14dpc nonTg DAPI Fli IB4 Mpx Bac N12 1 unmix.tif	Total	2	1			88100.7	22.7013	11.3506			0.0881007
RGB_14dpc nonTg DAPI Fli IB4 Mpx Bac N12 2 unmix.tif	Total	9	4	5.5	2.5	74969.2	120.049	53.3552	71.3753	32.3529	0.0749692
RGB_14dpc sflt4 DAPI Fli IB4 Mpx Bac S1 1 unmix.tif	Total	4	9			170961	23.3971	52.6434			0.170961
RGB_14dpc sflt4 DAPI Fli IB4 Mpx Bac S1 2 unmix.tif	Total	10	27			266177	37.569	101.436			0.266177
RGB_14dpc sflt4 DAPI Fli IB4 Mpx Bac S1 3 unmix.tif	Total	9	16			239134	37.6358	66.9081			0.239134
RGB_14dpc sflt4 DAPI Fli IB4 Mpx Bac S1 4 unmix.tif	Total	5	20	7	18	227957	21.9339	87.7358	30.134	77.1809	0.227957
RGB_14dpc sflt4 DAPI Fli IB4 Mpx Bac S2 1 unmix.tif	Total	1	2			208016	4.80733	9.61467			0.208016
RGB_14dpc sflt4 DAPI Fli IB4 Mpx Bac S2 2 unmix.tif	Total	2	4			211573	9.45299	18.906			0.211573
RGB_14dpc sflt4 DAPI Fli IB4 Mpx Bac S2 3 unmix.tif	Total	1	7			234281	4.26838	29.8787			0.234281
RGB_14dpc sflt4 DAPI Fli IB4 Mpx Bac S2 4 unmix.tif	Total	7	4	2.75	4.25	241638	28.969	16.5537	11.8744	18.7383	0.241638	14dpc sFlt wound-site IB4 and Mpx
RGB_14dpc sflt4 DAPI Fli IB4 Mpx Bac S3 1 unmix.tif	Total	17	45			241934	70.267	186.001			0.241934
RGB_14dpc sflt4 DAPI Fli IB4 Mpx Bac S3 2 unmix.tif	Total	3	67			268673	11.166	249.374			0.268673
RGB_14dpc sflt4 DAPI Fli IB4 Mpx Bac S3 3 unmix.tif	Total	8	53	9.33333	55	303942	26.3208	174.376	35.9179	203.25	0.303942
RGB_14dpc sflt4 DAPI Fli IB4 Mpx Bac S4 1 unmix.tif	Total	4	24			192644	20.7637	124.582			0.192644
RGB_14dpc sflt4 DAPI Fli IB4 Mpx Bac S4 2 unmix.tif	Total	1	25			212269	4.71101	117.775			0.212269
RGB_14dpc sflt4 DAPI Fli IB4 Mpx Bac S4 3 unmix.tif	Total	3	27	2.66667	25.3333	157909	18.9983	170.985	14.8244	137.781	0.157909
RGB_14dpc sflt4 DAPI Fli IB4 Mpx Bac S5 1 unmix.tif	Total	4	191			297618	13.44	641.761			0.297618
RGB_14dpc sflt4 DAPI Fli IB4 Mpx Bac S5 2 unmix.tif	Total	3	97			299609	10.0131	323.755			0.299609
RGB_14dpc sflt4 DAPI Fli IB4 Mpx Bac S5 3 unmix.tif	Total	1	43	2.66667	110.333	233686	4.27925	184.008	9.24411	383.175	0.233686
RGB_14dpc sflt4 DAPI Fli IB4 Mpx Bac S6 1 unmix.tif	Total	28	68			355953	78.662	191.036			0.355953
RGB_14dpc sflt4 DAPI Fli IB4 Mpx Bac S6 2 unmix.tif	Total	33	83			356672	92.5221	232.707			0.356672
RGB_14dpc sflt4 DAPI Fli IB4 Mpx Bac S6 3 unmix.tif	Total	38	99			384234	98.898	257.655			0.384234
RGB_14dpc sflt4 DAPI Fli IB4 Mpx Bac S6 4 unmix.tif	Total	15	82	28.5	83	309204	48.5117	265.197	79.6484	236.649	0.309204
RGB_56dpc nonTg DAPI Fli IB4 Mpx Bac NC1 1 unmix.tif	Total	1	5			224477	4.45479	22.274
RGB_56dpc nonTg DAPI Fli IB4 Mpx Bac NC1 2 unmix.tif		2	0			214220	9.33621	0
RGB_56dpc nonTg DAPI Fli IB4 Mpx Bac NC1 3 unmix.tif	Total	3	3	2	2.66667	129283	23.2049	23.2049	12.332	15.1596
RGB_56dpc nonTg DAPI Fli IB4 Mpx Bac NC2 1 unmix.tif		1	2			308068	3.24603	6.49207
RGB_56dpc nonTg DAPI Fli IB4 Mpx Bac NC2 2 unmix.tif	Total	2	12			316893	6.31127	37.8676
RGB_56dpc nonTg DAPI Fli IB4 Mpx Bac NC2 3 unmix.tif		0	1			245015	0	4.08138
RGB_56dpc nonTg DAPI Fli IB4 Mpx Bac NC2 4 unmix.tif		0	1	0.75	4	195853	0	5.10586	2.38933	13.3867
RGB_56dpc nonTg DAPI Fli IB4 Mpx Bac NC3 1 unmix.tif		0	4			236299	0	16.9277
RGB_56dpc nonTg DAPI Fli IB4 Mpx Bac NC3 2 unmix.tif	Total	2	3			328174	6.09434	9.14151				56dpc nonTg wound-site IB4 and Mpx
RGB_56dpc nonTg DAPI Fli IB4 Mpx Bac NC3 3 unmix.tif	Total	1	3	1	3.33333	252046	3.96753	11.9026	3.35396	12.6573
RGB_56dpc nonTg DAPI Fli IB4 Mpx Bac NC4 1 unmix.tif	Total	4	5			286262	13.9732	17.4665
RGB_56dpc nonTg DAPI Fli IB4 Mpx Bac NC4 2 unmix.tif	Total	4	1			311738	12.8313	3.20782
RGB_56dpc nonTg DAPI Fli IB4 Mpx Bac NC4 3 unmix.tif	Total	5	1	4.33333	2.33333	288751	17.3159	3.46319	14.7068	8.04583
RGB_56dpc nonTg DAPI Fli IB4 Mpx Bac NC5 1 unmix.tif		1	1			130656	7.65368	7.65368
RGB_56dpc nonTg DAPI Fli IB4 Mpx Bac NC5 2 unmix.tif		1	1			140043	7.14068	7.14068
RGB_56dpc nonTg DAPI Fli IB4 Mpx Bac NC5 3 unmix.tif		1	4	1	2	143758	6.95614	27.8246	7.25017	14.2063
RGB_56dpc nonTg DAPI Fli IB4 Mpx Bac NC6 1 unmix.tif		1	1			109298	9.1493	9.1493
RGB_56dpc nonTg DAPI Fli IB4 Mpx Bac NC6 2 unmix.tif		2	2			120393	16.6123	16.6123
RGB_56dpc nonTg DAPI Fli IB4 Mpx Bac NC6 3 unmix.tif		1	0	1.33333	1	106914	9.35335	0	11.705	8.58719
RGB_57dpc HSsflt4 DAPI Fli IB4 Mpx Bac TC1 1 unmix.tif	Total	1	20			331273	3.01866	60.3732
RGB_57dpc HSsflt4 DAPI Fli IB4 Mpx Bac TC1 2 unmix.tif	Total	3	16			305812	9.80996	52.3198
RGB_57dpc HSsflt4 DAPI Fli IB4 Mpx Bac TC1 3 unmix.tif	Total	0	19			309879	0	61.3142
RGB_57dpc HSsflt4 DAPI Fli IB4 Mpx Bac TC1 4 unmix.tif		0	9	1	16	276852	0	32.5084	3.20716	51.6289
RGB_57dpc HSsflt4 DAPI Fli IB4 Mpx Bac TC2 1 unmix.tif	Total	1	7			227925	4.38742	30.7119
RGB_57dpc HSsflt4 DAPI Fli IB4 Mpx Bac TC2 2 unmix.tif	Total	2	17			226645	8.82437	75.0072
RGB_57dpc HSsflt4 DAPI Fli IB4 Mpx Bac TC2 3 unmix.tif		1	1	1.33333	8.33333	206481	4.84307	4.84307	6.01829	36.8541
RGB_57dpc HSsflt4 DAPI Fli IB4 Mpx Bac TC3 1 unmix.tif	Total	7	18			403421	17.3516	44.6184
RGB_57dpc HSsflt4 DAPI Fli IB4 Mpx Bac TC3 2 unmix.tif	Total	3	16			397007	7.55655	40.3016
RGB_57dpc HSsflt4 DAPI Fli IB4 Mpx Bac TC3 3 unmix.tif	Total	4	7			380596	10.5098	18.3922
RGB_57dpc HSsflt4 DAPI Fli IB4 Mpx Bac TC3 4 unmix.tif	Total	6	16	5	14.25	289075	20.7559	55.349	14.0435	39.6653
RGB_57dpc HSsflt4 DAPI Fli IB4 Mpx Bac TC4 1 unmix.tif	Total	3	9			140604	21.3366	64.0097
RGB_57dpc HSsflt4 DAPI Fli IB4 Mpx Bac TC4 2 unmix.tif	Total	4	4			185043	21.6166	21.6166				56dpc sFlt wound-site IB4 and Mpx
RGB_57dpc HSsflt4 DAPI Fli IB4 Mpx Bac TC4 3 unmix.tif	Total	5	6			199867	25.0166	30.0199
RGB_57dpc HSsflt4 DAPI Fli IB4 Mpx Bac TC4 4 unmix.tif	Total	1	8	3.25	6.75	209792	4.76663	38.133	18.1841	38.4448
RGB_57dpc HSsflt4 DAPI Fli IB4 Mpx Bac TC5 1 unmix.tif	Total	2	4			217725	9.18589	18.3718
RGB_57dpc HSsflt4 DAPI Fli IB4 Mpx Bac TC5 2 unmix.tif	Total	1	4			304615	3.28283	13.1313
RGB_57dpc HSsflt4 DAPI Fli IB4 Mpx Bac TC5 3 unmix.tif		2	5			279231	7.16254	17.9063
RGB_57dpc HSsflt4 DAPI Fli IB4 Mpx Bac TC5 4 unmix.tif		1	2	1.5	3.75	330171	3.02874	6.05747	5.665	13.8667
RGB_57dpc HSsflt4 DAPI Fli IB4 Mpx Bac TC6 1 unmix.tif	Total	2	8			232569	8.59962	34.3985
RGB_57dpc HSsflt4 DAPI Fli IB4 Mpx Bac TC6 2 unmix.tif	Total	9	5			273394	32.9195	18.2886
RGB_57dpc HSsflt4 DAPI Fli IB4 Mpx Bac TC6 3 unmix.tif	Total	1	4			341711	2.92645	11.7058
RGB_57dpc HSsflt4 DAPI Fli IB4 Mpx Bac TC6 4 unmix.tif		3	1	3.75	4.5	336279	8.92118	2.97373	13.3417	16.8416
RGB_60dpc nonTg HS DAPI Fli IB4 Mpx Bac C3 1 unmix.tif	Total	4	2			123981	32.263	16.1315
RGB_60dpc nonTg HS DAPI Fli IB4 Mpx Bac C3 2 unmix.tif	Total	3	0			97155	30.8785	0
RGB_60dpc nonTg HS DAPI Fli IB4 Mpx Bac C3 3 unmix.tif		1	0	2.66667	0.666667	71597.7	13.9669	0	25.7028	5.37717
RGB_60dpc nonTg HS DAPI Fli IB4 Mpx Bac C4 1 unmix.tif		0	0			159780	0	0
RGB_60dpc nonTg HS DAPI Fli IB4 Mpx Bac C4 2 unmix.tif	Total	2	1			173157	11.5502	5.77509
RGB_60dpc nonTg HS DAPI Fli IB4 Mpx Bac C4 3 unmix.tif	Total	2	1	1.33333	0.666667	175604	11.3892	5.69461	7.64647	3.82324
RGB_60dpc nonTg HS DAPI Fli IB4 Mpx Bac C5 1 unmix.tif	Total	1	8			324519	3.08148	24.6519
RGB_60dpc nonTg HS DAPI Fli IB4 Mpx Bac C5 2 unmix.tif		0	0			300171	0	0
RGB_60dpc nonTg HS DAPI Fli IB4 Mpx Bac C5 3 unmix.tif		0	1	0.333333	3	284516	0	3.51474	1.02716	9.38887		60dpc nonTg wound-site IB4 and Mpx
RGB_60dpc nonTg HS DAPI Fli IB4 Mpx Bac C6 1 unmix.tif	Total	1	0			239160	4.1813	0
RGB_60dpc nonTg HS DAPI Fli IB4 Mpx Bac C6 2 unmix.tif	Total	1	0			224520	4.45395	0
RGB_60dpc nonTg HS DAPI Fli IB4 Mpx Bac C6 3 unmix.tif	Total	3	0	1.66667	0	144405	20.775	0	9.8034	0
RGB_60dpc nonTg HS DAPI Fli IB4 Mpx Bac C7 1 unmix.tif	Total	4	2			99435.6	40.227	20.1135
RGB_60dpc nonTg HS DAPI Fli IB4 Mpx Bac C7 2 unmix.tif	Total	1	2			88372.6	11.3157	22.6314
RGB_60dpc nonTg HS DAPI Fli IB4 Mpx Bac C7 3 unmix.tif	Total	5	1	3.33333	1.66667	78338.4	63.8257	12.7651	38.4561	18.5034
RGB_60dpc nonTg HS DAPI Fli IB4 Mpx Bac C8 1 unmix.tif		1	0			64170	15.5836	0
RGB_60dpc nonTg HS DAPI Fli IB4 Mpx Bac C8 2 unmix.tif		0	0			36773.5	0	0
RGB_60dpc nonTg HS DAPI Fli IB4 Mpx Bac C8 3 unmix.tif	Total	1	1	0.666667	0.333333	47033.7	21.2614	21.2614	12.2817	7.08712
RGB_60dpc sFlt4 HS DAPI Fli IB4 Mpx Bac C9 1 unmix.tif	Total	4	4			322313	12.4103	12.4103
RGB_60dpc sFlt4 HS DAPI Fli IB4 Mpx Bac C9 2 unmix.tif		6	0			384281	15.6136	0
RGB_60dpc sFlt4 HS DAPI Fli IB4 Mpx Bac C9 3 unmix.tif		0	0	3.33333	1.33333	261301	0	0	9.34129	4.13676
RGB_60dpc sFlt4 HS DAPI Fli IB4 Mpx Bac C10 1 unmix.tif	Total	5	2			239093	20.9124	8.36495
RGB_60dpc sFlt4 HS DAPI Fli IB4 Mpx Bac C10 2 unmix.tif		1	0			289353	3.45599	0
RGB_60dpc sFlt4 HS DAPI Fli IB4 Mpx Bac C10 3 unmix.tif	Total	6	17			340542	17.619	49.9204
RGB_60dpc sFlt4 HS DAPI Fli IB4 Mpx Bac C10 4 unmix.tif	Total	5	1			293576	17.0314	3.40627
RGB_60dpc sFlt4 HS DAPI Fli IB4 Mpx Bac C10 5 unmix.tif		1	0			208944	4.78597	0
RGB_60dpc sFlt4 HS DAPI Fli IB4 Mpx Bac C10 6 unmix.tif	Total	4	3	3.66667	3.83333	149691	26.7217	20.0413	15.0877	13.6221
RGB_60dpc sFlt4 HS DAPI Fli IB4 Mpx Bac C11 1 unmix.tif	Total	2	8			307897	6.49567	25.9827
RGB_60dpc sFlt4 HS DAPI Fli IB4 Mpx Bac C11 2 unmix.tif	Total	7	9			323019	21.6706	27.8622
RGB_60dpc sFlt4 HS DAPI Fli IB4 Mpx Bac C11 3 unmix.tif	Total	8	7	5.66667	8	323951	24.6951	21.6082	17.6204	25.151		60dpc sFlt4 wound-site IB4 and Mpx
RGB_60dpc sFlt4 HS DAPI Fli IB4 Mpx Bac C12 1 unmix.tif	Total	2	6			187039	10.6929	32.0788
RGB_60dpc sFlt4 HS DAPI Fli IB4 Mpx Bac C12 2 unmix.tif		0	0			245974	0	0
RGB_60dpc sFlt4 HS DAPI Fli IB4 Mpx Bac C12 3 unmix.tif	Total	1	10			222149	4.50147	45.0147
RGB_60dpc sFlt4 HS DAPI Fli IB4 Mpx Bac C12 4 unmix.tif	Total	5	15	2	7.75	165345	30.2398	90.7195	11.3586	41.9533
RGB_60dpc sFlt4 HS DAPI Fli IB4 Mpx Bac C13 1 unmix.tif		0	1			84050.4	0	11.8976
RGB_60dpc sFlt4 HS DAPI Fli IB4 Mpx Bac C13 2 unmix.tif	Total	1	2			81347.6	12.2929	24.5859
RGB_60dpc sFlt4 HS DAPI Fli IB4 Mpx Bac C13 3 unmix.tif	Total	2	1	1	1.33333	59140.7	33.8176	16.9088	15.3702	17.7974
RGB_60dpc sFlt4 HS DAPI Fli IB4 Mpx Bac C14 1 unmix.tif	Total	4	2			53559	74.684	37.342
RGB_60dpc sFlt4 HS DAPI Fli IB4 Mpx Bac C14 2 unmix.tif	Total	7	4			96424.5	72.5956	41.4832
RGB_60dpc sFlt4 HS DAPI Fli IB4 Mpx Bac C14 3 unmix.tif	Total	7	10			109767	63.7717	91.1024
RGB_60dpc sFlt4 HS DAPI Fli IB4 Mpx Bac C14 4 unmix.tif	Total	4	17	5.5	8.25	111245	35.9567	152.816	61.752	80.6859
