# Supplementary material for: Late developing cardiac lymphatic vasculature supports adult zebrafish heart function and regeneration
Source: eLife. 2019 Nov 8;8:e42762. doi: 10.7554/eLife.42762 (PMC6881116; doi:10.7554/eLife.42762)
Supplement: Figure 6—figure supplement 3—source data 1. [file elife-42762-fig6-figsupp3-data1.xlsx]

## Sheet: Sheet1
Title/Sample	Number of sprouts	Injured Area	Vessel Area	Injured Area mm^2	sprouts/area mm^2	% coverage
14dpc
14dpc 258dpf HSsflt4 Lyve1Kdrl 31mm 1 apex max.lsm	36	669901	69146.9	0.669901	53.7393	10.322
14dpc 258dpf HSsflt4 Lyve1Kdrl 31mm 1 max.lsm
14dpc 258dpf HSsflt4 Lyve1Kdrl 31mm 1b max.lsm
14dpc 258dpf HSsflt4 Lyve1Kdrl 31mm 2 apex max.lsm	5	187733	36795	0.187733	26.6335	19.5996
14dpc 258dpf HSsflt4 Lyve1Kdrl 31mm 2 max.lsm
14dpc 258dpf HSsflt4 Lyve1Kdrl 31mm 2b max.lsm
14dpc 258dpf HSsflt4 Lyve1Kdrl 36mm 3 apex max.lsm
14dpc 258dpf HSsflt4 Lyve1Kdrl 36mm 3 max.lsm	9	417589	54016.8	0.417589	21.5523	12.9354
14dpc 258dpf HSsflt4 Lyve1Kdrl 36mm 3b max.lsm
14dpc 258dpf nonTg Lyve1Kdrl 35mm 8 apex max.lsm
14dpc 258dpf nonTg Lyve1Kdrl 35mm 8 max.lsm	8	353348	41353.7	0.353348	22.6406	11.7034
14dpc 258dpf nonTg Lyve1Kdrl 35mm 8b max.lsm
14dpc 258dpf nonTg Lyve1Kdrl 35mm 9 apex max.lsm
14dpc 258dpf nonTg Lyve1Kdrl 35mm 9 max.lsm	7	129427	17447	0.129427	54.0847	13.4802
14dpc 258dpf nonTg Lyve1Kdrl 35mm 9b max.lsm
14dpc 258dpf nonTg Lyve1Kdrl 36mm 7 apex max.lsm
14dpc 258dpf nonTg Lyve1Kdrl 36mm 7 max.lsm	1	535272	115707	0.535272	1.86821	21.6164
14dpc 258dpf nonTg Lyve1Kdrl 36mm 7b max.lsm
15dpc 259dpf HSsflt4 Lyve1Kdrl 34mm 6 max.lsm	7	409303	30172.6	0.409303	17.1022	7.3717
15dpc 259dpf HSsflt4 Lyve1Kdrl 34mm 6b max.lsm
15dpc 259dpf HSsflt4 Lyve1Kdrl 35mm 4 apex max.lsm
15dpc 259dpf HSsflt4 Lyve1Kdrl 35mm 4 max.lsm	8	279821	48801.5	0.279821	28.5897	17.4403
15dpc 259dpf HSsflt4 Lyve1Kdrl 35mm 4b max.lsm
15dpc 259dpf HSsflt4 Lyve1Kdrl 36mm 5 apex max.lsm
15dpc 259dpf HSsflt4 Lyve1Kdrl 36mm 5 max.lsm	7	420697	18003.5	0.420697	16.639	4.27945
15dpc 259dpf HSsflt4 Lyve1Kdrl 36mm 5b max.lsm
15dpc 259dpf nonTg Lyve1Kdrl 36mm 12 apex max.lsm
15dpc 259dpf nonTg Lyve1Kdrl 36mm 12 max.lsm	5	242488	27696.3	0.242488	20.6196	11.4217
15dpc 259dpf nonTg Lyve1Kdrl 36mm 12b max.lsm
15dpc 259dpf nonTg Lyve1Kdrl 37mm 11 apex max.lsm
15dpc 259dpf nonTg Lyve1Kdrl 37mm 11 max.lsm	5	259403	64266.1	0.259403	19.275	24.7746
15dpc 259dpf nonTg Lyve1Kdrl 37mm 11b max.lsm
15dpc 259dpf nonTg Lyve1Kdrl 39mm 10 apex max.lsm
15dpc 259dpf nonTg Lyve1Kdrl 39mm 10 max.lsm	12	342942	55136.2	0.342942	34.9913	16.0774
15dpc 259dpf nonTg Lyve1Kdrl 39mm 10b max.lsm
AVERAGE
14dpc 258dpf HSsflt4 Lyve1Kdrl	12	397507	42822.7	0.397507	27.376	11.9914
14dpc 258dpf nonTg Lyve1Kdrl	6.33333	310480	53601	0.31048	25.5799	16.5123
56dpc
56dpc 301dpf nonTg Lyve1Kdrl 30mm NC2 max.lsm	2	361215	164808	0.361215	5.53687	45.6261
56dpc 301dpf nonTg Lyve1Kdrl 30mm NC2 x5 max.lsm
56dpc 301dpf nonTg Lyve1Kdrl 30mm NC2a max.lsm
56dpc 301dpf nonTg Lyve1Kdrl 30mm NC2b max.lsm
56dpc 301dpf nonTg Lyve1Kdrl 34mm NC1 max.lsm
56dpc 301dpf nonTg Lyve1Kdrl 34mm NC1 x5 max.lsm
56dpc 301dpf nonTg Lyve1Kdrl 34mm NC1a max.lsm	3	417989	74559.2	0.417989	7.17722	17.8376
56dpc 301dpf nonTg Lyve1Kdrl 34mm NC1a x5 max.lsm
56dpc 301dpf nonTg Lyve1Kdrl 34mm NC1b max.lsm
56dpc 301dpf nonTg Lyve1Kdrl 34mm NC1b x5 max.lsm
56dpc 301dpf nonTg Lyve1Kdrl 34mm NC4 max.lsm
56dpc 301dpf nonTg Lyve1Kdrl 34mm NC4 x5 max.lsm
56dpc 301dpf nonTg Lyve1Kdrl 34mm NC4a max.lsm	4	115513	16959.2	0.115513	34.6282	14.6817
56dpc 301dpf nonTg Lyve1Kdrl 34mm NC4a x5 max.lsm
56dpc 301dpf nonTg Lyve1Kdrl 34mm NC4b max.lsm
56dpc 301dpf nonTg Lyve1Kdrl 34mm NC4b x5 max.lsm
56dpc 301dpf nonTg Lyve1Kdrl 34mm NC5 max.lsm
56dpc 301dpf nonTg Lyve1Kdrl 34mm NC5 x5 max.lsm
56dpc 301dpf nonTg Lyve1Kdrl 34mm NC5a max.lsm	2	307192	57556.2	0.307192	6.51059	18.7363
56dpc 301dpf nonTg Lyve1Kdrl 34mm NC5a x5 max.lsm
56dpc 301dpf nonTg Lyve1Kdrl 34mm NC5b max.lsm
56dpc 301dpf nonTg Lyve1Kdrl 34mm NC5b x5 max.lsm
56dpc 301dpf nonTg Lyve1Kdrl 35mm NC3 max.lsm	1	468229	79030.4	0.468229	2.13571	16.8786
56dpc 301dpf nonTg Lyve1Kdrl 35mm NC3 x5 max.lsm
56dpc 301dpf nonTg Lyve1Kdrl 35mm NC3a max.lsm
56dpc 301dpf nonTg Lyve1Kdrl 35mm NC3a x5 max.lsm
56dpc 301dpf nonTg Lyve1Kdrl 35mm NC3b max.lsm
56dpc 301dpf nonTg Lyve1Kdrl 35mm NC3b x5 max.lsm
56dpc 301dpf nonTg Lyve1Kdrl 36mm NC6 max.lsm	0	288025	28421.7	0.288025	0	9.86778
56dpc 301dpf nonTg Lyve1Kdrl 36mm NC6 x5 max.lsm
56dpc 301dpf nonTg Lyve1Kdrl 36mm NC6a max.lsm
56dpc 301dpf nonTg Lyve1Kdrl 36mm NC6a x5 max.lsm
56dpc 301dpf nonTg Lyve1Kdrl 36mm NC6b max.lsm
56dpc 301dpf nonTg Lyve1Kdrl 36mm NC6b x5 max.lsm
57dpc 302dpf HSsflt4 Lyve1Kdrl 32mm TC4 max.lsm
57dpc 302dpf HSsflt4 Lyve1Kdrl 32mm TC4 x5 max.lsm
57dpc 302dpf HSsflt4 Lyve1Kdrl 32mm TC4a max.lsm	0	254832	15170.7	0.254832	0	5.95323
57dpc 302dpf HSsflt4 Lyve1Kdrl 32mm TC4a x5 max.lsm
57dpc 302dpf HSsflt4 Lyve1Kdrl 32mm TC4b max.lsm
57dpc 302dpf HSsflt4 Lyve1Kdrl 32mm TC4b x5 max.lsm
57dpc 302dpf HSsflt4 Lyve1Kdrl 32mm TC5 max.lsm	5	264825	39496.4	0.264825	18.8804	14.9142
57dpc 302dpf HSsflt4 Lyve1Kdrl 32mm TC5 x5 max.lsm
57dpc 302dpf HSsflt4 Lyve1Kdrl 32mm TC5a max.lsm
57dpc 302dpf HSsflt4 Lyve1Kdrl 32mm TC5a x5 max.lsm
57dpc 302dpf HSsflt4 Lyve1Kdrl 32mm TC5b max.lsm
57dpc 302dpf HSsflt4 Lyve1Kdrl 32mm TC5b x5 max.lsm
57dpc 302dpf HSsflt4 Lyve1Kdrl 32mm TC6 max.lsm	6	296880	26345.6	0.29688	20.2102	8.87414
57dpc 302dpf HSsflt4 Lyve1Kdrl 32mm TC6 x5 max.lsm
57dpc 302dpf HSsflt4 Lyve1Kdrl 32mm TC6a max.lsm
57dpc 302dpf HSsflt4 Lyve1Kdrl 32mm TC6a x5 max.lsm
57dpc 302dpf HSsflt4 Lyve1Kdrl 32mm TC6b max.lsm
57dpc 302dpf HSsflt4 Lyve1Kdrl 32mm TC6b x5 max.lsm
57dpc 302dpf HSsflt4 Lyve1Kdrl 35mm TC2 max.lsm	1	263437	46787.9	0.263437	3.79598	17.7606
57dpc 302dpf HSsflt4 Lyve1Kdrl 35mm TC2 x5 max.lsm
57dpc 302dpf HSsflt4 Lyve1Kdrl 35mm TC2a max.lsm
57dpc 302dpf HSsflt4 Lyve1Kdrl 35mm TC2a x5 max.lsm
57dpc 302dpf HSsflt4 Lyve1Kdrl 35mm TC2a2 max.lsm
57dpc 302dpf HSsflt4 Lyve1Kdrl 35mm TC2b max.lsm
57dpc 302dpf HSsflt4 Lyve1Kdrl 35mm TC2b x5 max.lsm
57dpc 302dpf HSsflt4 Lyve1Kdrl 35mm TC3 max.lsm
57dpc 302dpf HSsflt4 Lyve1Kdrl 35mm TC3 x5 max.lsm	7	762639	23913	0.762639	9.17865	3.13556
57dpc 302dpf HSsflt4 Lyve1Kdrl 35mm TC3a max.lsm
57dpc 302dpf HSsflt4 Lyve1Kdrl 35mm TC3a x5 max.lsm
57dpc 302dpf HSsflt4 Lyve1Kdrl 35mm TC3b max.lsm
57dpc 302dpf HSsflt4 Lyve1Kdrl 35mm TC3b x5 max.lsm
57dpc 302dpf HSsflt4 Lyve1Kdrl 36mm TC1 max.lsm	3	336370	25770.2	0.33637	8.91875	7.66128
57dpc 302dpf HSsflt4 Lyve1Kdrl 36mm TC1 x5 max.lsm
57dpc 302dpf HSsflt4 Lyve1Kdrl 36mm TC1a max.lsm
57dpc 302dpf HSsflt4 Lyve1Kdrl 36mm TC1a x5 max.lsm
57dpc 302dpf HSsflt4 Lyve1Kdrl 36mm TC1b max.lsm
57dpc 302dpf HSsflt4 Lyve1Kdrl 36mm TC1b x5 max.lsm
AVERAGE
56dpc 301dpf nonTg Lyve1Kdrl	2	326361	70222.5	0.326361	9.33143	20.6047
57dpc 302dpf HSsflt4 Lyve1Kdrl	3.66667	363164	29580.6	0.363164	10.164	9.71649
