# Supplementary material for: Late developing cardiac lymphatic vasculature supports adult zebrafish heart function and regeneration
Source: eLife. 2019 Nov 8;8:e42762. doi: 10.7554/eLife.42762 (PMC6881116; doi:10.7554/eLife.42762)
Supplement: Figure 6—figure supplement 4—source data 1. [file elife-42762-fig6-figsupp4-data1.xlsx]

## Sheet: Figure 6v
File	Scar Area	Regeneration Area	Minimum distance from Epicardium	Total	%Regen	%Scar
RGB_14dpc NonsFlt4 Fli Lyve1 n7 x10.tif	0.269	0.045	0.01	0.314	14.3312	85.6688
RGB_14dpc NonsFlt4 Fli Lyve1 n8 x10.tif	0.181	0.029	0	0.21	13.8095	86.1905
RGB_14dpc NonsFlt4 Fli Lyve1 n9 x10.tif	0.07	0.032	0	0.102	31.3725	68.6275
RGB_14dpc NonsFlt4 Fli Lyve1 n10 x10.tif	0.118	0.022	0	0.14	15.7143	84.2857	14dpc nonTg Scar and regenerated myocardium area and internalization
RGB_14dpc NonsFlt4 Fli Lyve1 n11 x10.tif	0.061	0.027	0.061	0.088	30.6818	69.3182
RGB_14dpc NonsFlt4 Fli Lyve1 n12 x10.tif	0.011	0.009	0.024	0.02	45	55
RGB_14dpc sFlt4 Fli Lyve1 s1 x10.tif	0.277	0.037	0	0.314	11.7834	88.2166
RGB_14dpc sFlt4 Fli Lyve1 s2 x10.tif	0.131	0.017	0	0.148	11.4865	88.5135
RGB_14dpc sFlt4 Fli Lyve1 s3 x10.tif	0.145	0.008	0	0.153	5.22876	94.7712	14dpc sFlt4 Scar and regenerated myocardium area and internalization
RGB_14dpc sFlt4 Fli Lyve1 s4 x10.tif	0.072	0.017	0	0.089	19.1011	80.8989
RGB_14dpc sFlt4 Fli Lyve1 s5 x10.tif	0.057	0.028	0.017	0.085	32.9412	67.0588
RGB_14dpc sFlt4 Fli Lyve1 s6 x10.tif	0.195	0.031	0	0.226	13.7168	86.2832
56dpc nonTg FliLyve1 NC1 x5.tif	0.196	0.073	0.027	0.269	27.1375	72.8625
56dpc nonTg FliLyve1 NC2 x5.tif	0.116	0.077	0.044	0.193	39.8964	60.1036
56dpc nonTg FliLyve1 NC3 x5.tif	0.086	0.117	0.07	0.203	57.6355	42.3645	56dpc nonTg Scar and regenerated myocardium area and internalization
56dpc nonTg FliLyve1 NC4 x5.tif	0.092	0.049	0.044	0.141	34.7518	65.2482
56dpc nonTg FliLyve1 NC5 x5.tif	0.075	0.052	0.036	0.127	40.9449	59.0551
56dpc nonTg FliLyve1 NC6 x5.tif	0.021	0.059	0.011	0.08	73.75	26.25
57dpc sFlt4 FliLyve1 TC1 x5.tif	0.062	0.034	0.004	0.096	35.4167	64.5833
57dpc sFlt4 FliLyve1 TC3 x5.tif	0.145	0.024	0.012	0.169	14.2012	85.7988
57dpc sFlt4 FliLyve1 TC4 x5.tif	0.061	0.023	0	0.084	27.381	72.619	56dpc sFlt4 Scar and regenerated myocardium area and internalization
57dpc sFlt4 FliLyve1 TC5 x5.tif	0.1	0.057	0	0.157	36.3057	63.6943
57dpc sFlt4 FliLyve1 TC6 x5.tif	0.143	0.062	0.012	0.205	30.2439	69.7561
