# Supplementary material for: Late developing cardiac lymphatic vasculature supports adult zebrafish heart function and regeneration
Source: eLife. 2019 Nov 8;8:e42762. doi: 10.7554/eLife.42762 (PMC6881116; doi:10.7554/eLife.42762)
Supplement: Figure 6—figure supplement 4—source data 2. [file elife-42762-fig6-figsupp4-data2.xlsx]

## Sheet: Figure 6vi
Files							PCNA-positive	Mef2c	Total			in a 722X722px window adjecent to the woundsite
Crop_RGB_RGB_3dpc HSsFlt4 HS12d DAPI Fli PCNA Mef2c Bac T1 1 unmix.tif
Crop_RGB_RGB_3dpc HSsFlt4 HS12d DAPI Fli PCNA Mef2c Bac T1 2 unmix.tif							32	236	268	11.9403	9.68331	8.1823
Crop_RGB_RGB_3dpc HSsFlt4 HS12d DAPI Fli PCNA Mef2c Bac T1 3 unmix.tif							16	221	237	6.75105
Crop_RGB_RGB_3dpc HSsFlt4 HS12d DAPI Fli PCNA Mef2c Bac T1 4 unmix.tif							26	225	251	10.3586
Crop_RGB_RGB_3dpc HSsFlt4 HS12d DAPI Fli PCNA Mef2c Bac T2 1 unmix.tif
Crop_RGB_RGB_3dpc HSsFlt4 HS12d DAPI Fli PCNA Mef2c Bac T2 2 unmix.tif							6	306	312	1.92308	2.9846
Crop_RGB_RGB_3dpc HSsFlt4 HS12d DAPI Fli PCNA Mef2c Bac T2 3 unmix.tif							17	303	320	5.3125			3dpc sFlt4 Mef2c proliferation
Crop_RGB_RGB_3dpc HSsFlt4 HS12d DAPI Fli PCNA Mef2c Bac T2 4 unmix.tif							5	286	291	1.71821
Crop_RGB_RGB_3dpc HSsFlt4 HS12d DAPI Fli PCNA Mef2c Bac T3 1 unmix.tif
Crop_RGB_RGB_3dpc HSsFlt4 HS12d DAPI Fli PCNA Mef2c Bac T3 2 unmix.tif							17	487	504	3.37302	5.25578
Crop_RGB_RGB_3dpc HSsFlt4 HS12d DAPI Fli PCNA Mef2c Bac T3 3 unmix.tif							21	473	494	4.25101
Crop_RGB_RGB_3dpc HSsFlt4 HS12d DAPI Fli PCNA Mef2c Bac T3 4 unmix.tif							25	282	307	8.14332
Crop_RGB_RGB_3dpc HSsFlt4 HS12d DAPI Fli PCNA Mef2c Bac T4 1 unmix.tif
Crop_RGB_RGB_3dpc HSsFlt4 HS12d DAPI Fli PCNA Mef2c Bac T4 2 unmix.tif							13	338	351	3.7037	4.15403
Crop_RGB_RGB_3dpc HSsFlt4 HS12d DAPI Fli PCNA Mef2c Bac T4 3 unmix.tif							12	278	290	4.13793
Crop_RGB_RGB_3dpc HSsFlt4 HS12d DAPI Fli PCNA Mef2c Bac T4 4 unmix.tif							14	289	303	4.62046
Crop_RGB_RGB_3dpc HSsFlt4 HS12d DAPI Fli PCNA Mef2c Bac T5 1 unmix.tif							61	168	229	26.6376
Crop_RGB_RGB_3dpc HSsFlt4 HS12d DAPI Fli PCNA Mef2c Bac T5 2 unmix.tif											20.7634
Crop_RGB_RGB_3dpc HSsFlt4 HS12d DAPI Fli PCNA Mef2c Bac T5 3 unmix.tif							31	198	229	13.5371
Crop_RGB_RGB_3dpc HSsFlt4 HS12d DAPI Fli PCNA Mef2c Bac T5 4 unmix.tif							46	162	208	22.1154
Crop_RGB_RGB_3dpc HSsFlt4 HS12d DAPI Fli PCNA Mef2c Bac T6 1 unmix.tif							13	150	163	7.97546
Crop_RGB_RGB_3dpc HSsFlt4 HS12d DAPI Fli PCNA Mef2c Bac T6 2 unmix.tif							31	392	423	7.32861	6.25272
Crop_RGB_RGB_3dpc HSsFlt4 HS12d DAPI Fli PCNA Mef2c Bac T6 3 unmix.tif							34	397	431	7.88863
Crop_RGB_RGB_3dpc HSsFlt4 HS12d DAPI Fli PCNA Mef2c Bac T6 4 unmix.tif							8	432	440	1.81818
									Total
Ch_Crop_RGB_Crop_RGB_RGB_3dpc nonTg DAPI Fli PCNA Mef2c Bac n1 1 unmix.tif							7	448	455	1.53846	2.51631	8.94995
Ch_Crop_RGB_Crop_RGB_RGB_3dpc nonTg DAPI Fli PCNA Mef2c Bac n1 2 unmix.tif
Ch_Crop_RGB_Crop_RGB_RGB_3dpc nonTg DAPI Fli PCNA Mef2c Bac n1 3 unmix.tif						1	7	380	387	1.80879
Ch_Crop_RGB_Crop_RGB_RGB_3dpc nonTg DAPI Fli PCNA Mef2c Bac n1 4 unmix.tif						1	15	342	357	4.20168
Ch_Crop_RGB_Crop_RGB_RGB_3dpc nonTg DAPI Fli PCNA Mef2c Bac n1 5 unmix.tif
Ch_Crop_RGB_Crop_RGB_RGB_3dpc nonTg DAPI Fli PCNA Mef2c Bac n2 1 unmix.tif											6.44146		3dpc nonTg Mef2c proliferation
Ch_Crop_RGB_Crop_RGB_RGB_3dpc nonTg DAPI Fli PCNA Mef2c Bac n2 2 unmix.tif						1	20	285	305	6.55738
Ch_Crop_RGB_Crop_RGB_RGB_3dpc nonTg DAPI Fli PCNA Mef2c Bac n2 3 unmix.tif						1	14	327	341	4.10557
Ch_Crop_RGB_Crop_RGB_RGB_3dpc nonTg DAPI Fli PCNA Mef2c Bac n2 4 unmix.tif						1	33	348	381	8.66142
Ch_Crop_RGB_Crop_RGB_RGB_3dpc nonTg DAPI Fli PCNA Mef2c Bac n3 1 unmix.tif											5.4522
Ch_Crop_RGB_Crop_RGB_RGB_3dpc nonTg DAPI Fli PCNA Mef2c Bac n3 2 unmix.tif						1	21	358	379	5.5409
Ch_Crop_RGB_Crop_RGB_RGB_3dpc nonTg DAPI Fli PCNA Mef2c Bac n3 3 unmix.tif						1	10	247	257	3.89105
Ch_Crop_RGB_Crop_RGB_RGB_3dpc nonTg DAPI Fli PCNA Mef2c Bac n3 4 unmix.tif						Total	34	457	491	6.92464
Ch_Crop_RGB_Crop_RGB_RGB_3dpc nonTg DAPI Fli PCNA Mef2c Bac n4 1 unmix.tif						1	21	307	328	6.40244	6.39051
Ch_Crop_RGB_Crop_RGB_RGB_3dpc nonTg DAPI Fli PCNA Mef2c Bac n4 2 unmix.tif						1	27	359	386	6.99482
Ch_Crop_RGB_Crop_RGB_RGB_3dpc nonTg DAPI Fli PCNA Mef2c Bac n4 3 unmix.tif
Ch_Crop_RGB_Crop_RGB_RGB_3dpc nonTg DAPI Fli PCNA Mef2c Bac n4 4 unmix.tif						1	22	359	381	5.77428
Ch_Crop_RGB_Crop_RGB_RGB_3dpc nonTg DAPI Fli PCNA Mef2c Bac n5 1 unmix.tif						1	45	234	279	16.129	16.852
Ch_Crop_RGB_Crop_RGB_RGB_3dpc nonTg DAPI Fli PCNA Mef2c Bac n5 2 unmix.tif
Ch_Crop_RGB_Crop_RGB_RGB_3dpc nonTg DAPI Fli PCNA Mef2c Bac n5 3 unmix.tif						1	56	232	288	19.4444
Ch_Crop_RGB_Crop_RGB_RGB_3dpc nonTg DAPI Fli PCNA Mef2c Bac n5 4 unmix.tif						1	43	244	287	14.9826
Ch_Crop_RGB_Crop_RGB_RGB_3dpc nonTg DAPI Fli PCNA Mef2c Bac n6 1 unmix.tif						1	31	431	462	6.70996	16.0472
Ch_Crop_RGB_Crop_RGB_RGB_3dpc nonTg DAPI Fli PCNA Mef2c Bac n6 2 unmix.tif						1	45	370	415	10.8434
Ch_Crop_RGB_Crop_RGB_RGB_3dpc nonTg DAPI Fli PCNA Mef2c Bac n6 3 unmix.tif
Ch_Crop_RGB_Crop_RGB_RGB_3dpc nonTg DAPI Fli PCNA Mef2c Bac n6 4 unmix.tif						1	26	59	85	30.5882
