# Supplementary material for: Late developing cardiac lymphatic vasculature supports adult zebrafish heart function and regeneration
Source: eLife. 2019 Nov 8;8:e42762. doi: 10.7554/eLife.42762 (PMC6881116; doi:10.7554/eLife.42762)
Supplement: Figure 6—figure supplement 4—source data 3. [file elife-42762-fig6-figsupp4-data3.xlsx]

## Sheet: Figure 6vii
Files							PCNA-positive	Raldh2+DAPI only	Total	%PCNA	AVE % PCNA	Raldh2 from edge of wound site up to 700um away
Ch_Crop_RGB_RGB_3dpc HSsFlt4 HS12d DAPI Fli PCNA Raldh2 Bac T1 1 unmix.tif							7	11	18	38.8889	68.5085
Ch_Crop_RGB_RGB_3dpc HSsFlt4 HS12d DAPI Fli PCNA Raldh2 Bac T1 2 unmix.tif							10	13	23	43.4783
Ch_Crop_RGB_RGB_3dpc HSsFlt4 HS12d DAPI Fli PCNA Raldh2 Bac T1 3 unmix.tif							15	0	15	100
Ch_Crop_RGB_RGB_3dpc HSsFlt4 HS12d DAPI Fli PCNA Raldh2 Bac T1 4 unmix.tif							11	1	12	91.6667
Ch_Crop_RGB_RGB_3dpc HSsFlt4 HS12d DAPI Fli PCNA Raldh2 Bac T2 1 unmix.tif											76.22
Ch_Crop_RGB_RGB_3dpc HSsFlt4 HS12d DAPI Fli PCNA Raldh2 Bac T2 2 unmix.tif							29	10	39	74.359		3dpc sFlt4 Raldh2 proliferation
Ch_Crop_RGB_RGB_3dpc HSsFlt4 HS12d DAPI Fli PCNA Raldh2 Bac T2 3 unmix.tif							22	9	31	70.9677
Ch_Crop_RGB_RGB_3dpc HSsFlt4 HS12d DAPI Fli PCNA Raldh2 Bac T2 4 unmix.tif							20	4	24	83.3333
Ch_Crop_RGB_RGB_3dpc HSsFlt4 HS12d DAPI Fli PCNA Raldh2 Bac T3 1 unmix.tif											59.0315
Ch_Crop_RGB_RGB_3dpc HSsFlt4 HS12d DAPI Fli PCNA Raldh2 Bac T3 2 unmix.tif							19	15	34	55.8824
Ch_Crop_RGB_RGB_3dpc HSsFlt4 HS12d DAPI Fli PCNA Raldh2 Bac T3 3 unmix.tif							24	12	36	66.6667
Ch_Crop_RGB_RGB_3dpc HSsFlt4 HS12d DAPI Fli PCNA Raldh2 Bac T3 4 unmix.tif							18	15	33	54.5455
Ch_Crop_RGB_RGB_3dpc HSsFlt4 HS12d DAPI Fli PCNA Raldh2 Bac T4 1 unmix.tif											78.24
Ch_Crop_RGB_RGB_3dpc HSsFlt4 HS12d DAPI Fli PCNA Raldh2 Bac T4 2 unmix.tif							79	33	112	70.5357
Ch_Crop_RGB_RGB_3dpc HSsFlt4 HS12d DAPI Fli PCNA Raldh2 Bac T4 3 unmix.tif							76	29	105	72.381
Ch_Crop_RGB_RGB_3dpc HSsFlt4 HS12d DAPI Fli PCNA Raldh2 Bac T4 4 unmix.tif							56	5	61	91.8033
Ch_Crop_RGB_RGB_3dpc HSsFlt4 HS12d DAPI Fli PCNA Raldh2 Bac T6 1 unmix.tif							34	10	44	77.2727	65.6187
Ch_Crop_RGB_RGB_3dpc HSsFlt4 HS12d DAPI Fli PCNA Raldh2 Bac T6 2 unmix.tif							19	11	30	63.3333
Ch_Crop_RGB_RGB_3dpc HSsFlt4 HS12d DAPI Fli PCNA Raldh2 Bac T6 3 unmix.tif							9	7	16	56.25
Ch_Crop_RGB_RGB_3dpc HSsFlt4 HS12d DAPI Fli PCNA Raldh2 Bac T6 4 unmix.tif
Ch_Crop_RGB_RGB_3dpc nonTg HS12d DAPI Fli PCNA Raldh2 Bac n1 1 unmix.tif											47.9365
Ch_Crop_RGB_RGB_3dpc nonTg HS12d DAPI Fli PCNA Raldh2 Bac n1 2 unmix.tif							8	7	15	53.3333
Ch_Crop_RGB_RGB_3dpc nonTg HS12d DAPI Fli PCNA Raldh2 Bac n1 3 unmix.tif							10	11	21	47.619
Ch_Crop_RGB_RGB_3dpc nonTg HS12d DAPI Fli PCNA Raldh2 Bac n1 4 unmix.tif							9	12	21	42.8571
Ch_Crop_RGB_RGB_3dpc nonTg HS12d DAPI Fli PCNA Raldh2 Bac n2 1 unmix.tif							10	11	21	47.619	52.5397
Ch_Crop_RGB_RGB_3dpc nonTg HS12d DAPI Fli PCNA Raldh2 Bac n2 2 unmix.tif							17	13	30	56.6667
Ch_Crop_RGB_RGB_3dpc nonTg HS12d DAPI Fli PCNA Raldh2 Bac n2 3 unmix.tif							8	7	15	53.3333
Ch_Crop_RGB_RGB_3dpc nonTg HS12d DAPI Fli PCNA Raldh2 Bac n2 4 unmix.tif
Ch_Crop_RGB_RGB_3dpc nonTg HS12d DAPI Fli PCNA Raldh2 Bac n3 1 unmix.tif											69.3411	3dpc nonTg Raldh2 proliferation
Ch_Crop_RGB_RGB_3dpc nonTg HS12d DAPI Fli PCNA Raldh2 Bac n3 2 unmix.tif							11	8	19	57.8947
Ch_Crop_RGB_RGB_3dpc nonTg HS12d DAPI Fli PCNA Raldh2 Bac n3 3 unmix.tif
Ch_Crop_RGB_RGB_3dpc nonTg HS12d DAPI Fli PCNA Raldh2 Bac n3 4 unmix.tif							29	13	42	69.0476
Ch_Crop_RGB_RGB_3dpc nonTg HS12d DAPI Fli PCNA Raldh2 Bac n3 5 unmix.tif							30	7	37	81.0811
Ch_Crop_RGB_RGB_3dpc nonTg HS12d DAPI Fli PCNA Raldh2 Bac n4 1 unmix.tif											53.9562
Ch_Crop_RGB_RGB_3dpc nonTg HS12d DAPI Fli PCNA Raldh2 Bac n4 2 unmix.tif
Ch_Crop_RGB_RGB_3dpc nonTg HS12d DAPI Fli PCNA Raldh2 Bac n4 3 unmix.tif							19	17	36	52.7778
Ch_Crop_RGB_RGB_3dpc nonTg HS12d DAPI Fli PCNA Raldh2 Bac n4 4 unmix.tif							7	4	11	63.6364
Ch_Crop_RGB_RGB_3dpc nonTg HS12d DAPI Fli PCNA Raldh2 Bac n4 5 unmix.tif							5	6	11	45.4545
Ch_Crop_RGB_RGB_3dpc nonTg HS12d DAPI Fli PCNA Raldh2 Bac n5 1 unmix.tif							26	3	29	89.6552	87.4247
Ch_Crop_RGB_RGB_3dpc nonTg HS12d DAPI Fli PCNA Raldh2 Bac n5 2 unmix.tif							19	2	21	90.4762
Ch_Crop_RGB_RGB_3dpc nonTg HS12d DAPI Fli PCNA Raldh2 Bac n5 3 unmix.tif
Ch_Crop_RGB_RGB_3dpc nonTg HS12d DAPI Fli PCNA Raldh2 Bac n5 4 unmix.tif							23	5	28	82.1429
Ch_Crop_RGB_RGB_3dpc nonTg HS12d DAPI Fli PCNA Raldh2 Bac n6 1 unmix.tif							3	5	8	37.5	65.2066
Ch_Crop_RGB_RGB_3dpc nonTg HS12d DAPI Fli PCNA Raldh2 Bac n6 2 unmix.tif
Ch_Crop_RGB_RGB_3dpc nonTg HS12d DAPI Fli PCNA Raldh2 Bac n6 3 unmix.tif							8	1	9	88.8889
Ch_Crop_RGB_RGB_3dpc nonTg HS12d DAPI Fli PCNA Raldh2 Bac n6 4 unmix.tif							9	4	13	69.2308
